1 **Effects of a novel three-dimensional grid intrauterine device on**  
2 **the uterus, steroid receptor and PAX2 of rhesus macaques**

3

4 Mei-Hua Zhang<sup>1†</sup>, Li-Ping Zhai<sup>2†</sup>, Ling Yu<sup>1</sup>, Xia Song<sup>1</sup>, Jian-Chun Yu<sup>1\*</sup>, Yi  
5 Qiu<sup>1\*</sup>

6

7 1. *Key Laboratory of Birth Regulation and Control Technology of National Health*  
8 *Commission of China, Key Laboratory for Improving Birth Outcome Technique,*  
9 *Maternal and Child Health Care Hospital of Shandong Province, 238 East Road*  
10 *of Jingshi, Jinan, Shandong 250014, People's Republic of China*

11 2. *Shandong Provincial Institute of Control of Endemic Disease, East Road of*  
12 *Jingshi, Jinan, Shandong 250014, People's Republic of China*

13

14 Intrauterine devices (IUDs) is the most effective methods of the reversible and  
15 long-acting contraception. 1) To develop a novel three-dimensional grid intrauterine  
16 device (3-DGIUD) with nickel-titanium (Ni-Ti) and silicone rubber. 2) To observe the  
17 effect of the 3-DGIUD on contraceptive efficacy and the change of uterus,  
18 endometrial sex steroid receptor, PAX2 in rhesus macaques (*Macaca mulatta*). The  
19 materials of the 3-DGIUD were the nitinol wire and the silicone rubber. The frame of  
20 the 3-DGIUD was three-dimensional and grid-like. Twenty adult female rhesus  
21 macaques were divided into the 3-DGIUD group (placing the 3-DGIUD, n=9), the

22 sham operation group (no placing the 3-DGIUD, n=9) and the control group (n=2).  
23 On the 10<sup>th</sup>-day after surgery, the 3-DGIUD group and the sham operation group  
24 macaques were caged together with male macaques (female: male = 1:1). The uterus,  
25 3-DGIUD and pregnancy of 18 female rhesus monkeys were examined by abdominal  
26 ultrasound every month. The endometrium pathological examination was carried out  
27 and the expression of PAX2 and hormone receptor (ER, PR) was detected by  
28 immunohistochemical staining. After 3-DGIUD was placed in case group for 3 and 12  
29 months, only 1 of female macaque was pregnant in 9. The contraceptive effective rate  
30 was 88.9% (8/9). The 3-DGIUD in the uterus of macaques was observed by  
31 ultrasound. In the sham operation group, 9 macaques were pregnant (9/9). There was  
32 significant difference in uterine size of the 3-DGIUD group between pre-placement  
33 and after surgery for 3 and 12 months ( $P<0.05$ ). The endometrial epithelium was  
34 intact, just a small number of glands vacuoles and a few neutrophils infiltration  
35 around the 3-DGIUD. The expression of endometrial ER, PR and PAX2 in 3-DGIUD  
36 group on 12 months after surgery was similar to those in control macaque. The  
37 3-DGIUD has a good contraceptive effect on female macaques, and has no significant  
38 affection on the expression of endometrial steroid receptor and PAX2 in rhesus  
39 monkeys.

40

41 **Key words:** three-dimensional grid intrauterine device (3-DGIUD); contraception;  
42 sex steroid receptor; PAX2; rhesus macaques

43

44 **Short Title: Novel 3-DGIUD on uterus**

45

46 † These authors contributed equally to this work.

47 \* Corresponding author:

48 Jian-Chun Yu, E-mail: [yujchun@163.com](mailto:yujchun@163.com)

49 Yi Qiu, E-mail: [qiuyi987@sina.com](mailto:qiuyi987@sina.com)

50

51 This work was supported financially by grant of “the National Key Research and  
52 Development Plan” (2016YFC1000903).

53

## 55 **Introduction**

56 Appliance of contraceptives is the cornerstone of prevention for unintended  
57 pregnancy. The rate of unintended pregnancy in the United States is 51% and 45% in  
58 2011 and in 2008, respectively [1]. In China, more than 20% of teenager and  
59 unmarried women are pregnant every year [2], and the rate of undergoing repeat  
60 abortions and non-use of contraception in these adolescents is 39% and 68%,  
61 respectively [3]. Long-acting reversible contraceptive (LARC) methods could help  
62 reduce the high rate of unintended pregnancy. Among all available contraceptive  
63 methods, the failure rate of IUD is less than 1%, which is almost ideal and the most  
64 popular contraceptive method in the world [4,5]. IUDs are the most common forms  
65 for millions of women, particularly in mediate postpartum women [6-8]. Current data  
66 shows that more than 10% of childbearing aged women are using IUDs worldwide [4].  
67 In China, IUDs are utilized by 48%-51% women of childbearing aged in 2010-2015  
68 [5,8]. The rate of IUD use in American Muslim women are 21.2% [9]. In breast  
69 cancer women, the rate of IUDs use is 72.1% [10].

70 Although female contraceptive methods such as sterilization, IUDs and hormonal  
71 contraception are very effective in preventing unintended pregnancy, some women  
72 can't use them due to health condition or side effects. IUDs may cause side effects to  
73 some women. Migration, especially uterine perforations, expulsion, increased  
74 menstrual blood loss, pain, and uterus or pelvic inflammatory and risk of extrauterine  
75 pregnancy after IUD insertion are frequently occurred on patients [11,12]. IUD

76 migrated into bladder is a rare and serious complication [13]. On the other hand, the  
77 burst release of the cupric ion ( $\text{Cu}^{2+}$ ) of copper containing IUDs (Cu-IUDs) is an  
78 important side effect particularly in the first month. The Cu-IUDs,  
79 levonorgestrel-releasing intrauterine system (LNG-RIS) and implants are LARC.  
80 Excessive  $\text{Cu}^{2+}$  may cause toxic effect on the cell and increase bleeding and pain  
81 [14-16]. The LNG-RIS can increase irregular bleeding and/or spotting days  
82 particularly after 3 months of use [17,18]. In addition, the shape, size and weight of  
83 IUDs also have a great impact on contraceptive effects and side effects. The increase  
84 in menstrual volume caused by IUD seems to be related to the size of the device. The  
85 greater the size and weight of the IUD, the greater the amount of menstrual blood loss  
86 is. <sup>11,12</sup> Relationships between the size of the IUD and the size of the uterine cavity are  
87 also considered to be a factor in the expulsion of the IUD [12].

88 Inducing local inflammatory reaction in the endometrium is the major effect of all  
89 IUDs. The inflammatory response can be enhanced by Cu-IUDs.  $\text{Cu}^{+}$  is released from  
90 Cu-IUDs and reached in a concentration in the luminal fluids of the genital tract that  
91 is toxic for spermatozoa and embryos [19]. Cu-IUDs are usually associated with  
92 menorrhagia. As a local foreign body reaction, Cu-IUDs can cause certain  
93 morphological changes in the endometrium and infiltration of monocytes as well as a  
94 few plasma cells during the proliferative phase of the cycle [20]. The ovulation  
95 dysfunction hemorrhage may be related to morphological and biochemical changes in  
96 the IUD use. The LNG-RIS has profound morphological effects upon the

97 endometrium, which may lead to a large number of decidualization of endometrial  
98 stromal cells, atrophy of the glandular and surface epithelium and vascular  
99 morphology change [21,22]. Irregular bleeding is still a common reason for the  
100 discontinuation of progestin-only contraception [21]. Down-regulation of sex steroid  
101 receptors is found in all cellular components with endometrial exposure to LNG-RIS  
102 [22]. Paired box 2 (PAX2) is a member of paired box family and is an oncogene  
103 involved in the development of endometrial cancer. Recent studies have demonstrated  
104 that occurrence of PAX2 loss expression in endometrial hyperplasia increases with  
105 malignant progression, and PAX2 gene is required for embryonic uterine  
106 development, during endometrial carcinogenesis [23-25]. No study has been found  
107 in the effect of IUDs as the contraceptive method on endometrial sex steroid receptors  
108 and PAX2 expression in uterus of rhesus macaques.

109 We have reported that the main contraceptive mechanism effect of the  
110 three-dimensional reticular IUD (3-DRIUD) in rats, and observed that the larger the  
111 physical space occupied by the intrauterine device, the less the pregnancy [26]. In  
112 present study, we designed and manufactured a novel three-dimensional grid  
113 intrauterine device (3-DGIUD) with nickel-titanium (nitinol) wire and silicone rubber  
114 for rhesus macaques, and investigated the changes in the uterus and endometrium of  
115 macaques after the 3-DGIUD placement.

116

## 117 **Materials and Methods**

118

### 119 **Materials of the new 3-DGIUD and inserter for rhesus macaques**

120 The frame of the 3-DGIUD was composed of nitinol wire (with a diameter of 0.05  
121 mm) and covered with a layer of silicone rubber. Design the structure of the  
122 3-DGIUD was according to the size and shape of the rhesus macaque's uterus. The  
123 shape of the 3-DGIUD for rhesus macaques was three-dimensional in nature and had  
124 a reticular grid shape. Its height (H), upper width (D), lower width (d) and thickness  
125 were 0.6-1.2 cm, 0.4-0.6 cm and 0.2-0.4 cm, respectively (Figure 1 A, B and D). The  
126 weight of the 3-DGIUD was 0.015-0.020 g. A layer of silicon-boron coupling agent  
127 was covered on the surface of the 3-DGIUD, and finally multi-layer coating method  
128 was used with silica gel, and the 3-DGIUD coated with silica gel was vulcanized. The  
129 3-DGIUD was placed in the external casing tube of the inserter (Figure 1 C). Figure 1  
130 shows photographs of the 3-DGIUD for rhesus macaques.

131 The material of the inserter of the 3-DGIUD for rhesus macaques was stainless  
132 steel. Inserters of the 3-DGIUD were composed of an external casing tube (diameter  
133 2.0 mm) and an internal needle core (push-rod) (diameter 1.8 mm) (Figure 1 C).

134

### 135 **Animals**



136 Rhesus macaques were from the Fujian Provincial Non-human Primate Animal  
137 Experimental Center. All procedures were performed in accordance with "Guidelines  
138 for the Care and Use of Experimental Animals in Fujian Province", and approved by  
139 the Animal Care and Use Committee of Fujian Provincial Institute for Family  
140 Planning Science and Technology. In December 2016, twenty adult female rhesus  
141 macaques were divided into 3 groups, 9 macaques were in the 3-DGIUD group, 9 cases  
142 were taken as the sham operation group, and the other 2 cases were taken as control  
143 group (without surgery). The license number of the Animal Care and Use was SYXK  
144 (Min) 2015-0007 and SCXK (Min) 2015-0002. All macaques were single cage  
145 (stainless steel) with standard feeding. The indoor temperature of the animal was  
146 22~25°C, the relative humidity was 60~70%, artificial lighting was 12h/d, and the air  
147 was ventilated.

148

#### 149 **Surgical procedures**

150 The surgical procedures were carried out under sterile technique. Macaques were  
151 sedated with ketamine, atropine sulfate (0.02 mL/kg intramuscular injection) and  
152 ketamine hydrochloride (0.1–0.2 mL/kg intramuscular injection in a 50 mg/mL  
153 aqueous solution), the abdominal regions were shaved and the animals were  
154 positioned in the supine position. The lower abdominal region was disinfected with  
155 70% ethanol and iodine tincture and covered with sterilized drapes, and then surgical

156 midline lower abdominal incision was performed and the uterus was exposed (Figure  
157 2 A and B). The external dimensions of the uterus were measured with a sterilized  
158 caliper (Figure 2 B). Then a catheter was inserted into the uterus (Figure 2 C). The  
159 3-DGIUD was placed into the uterine cavity with a catheter for 9 macaques  
160 (3-DGIUD group). The sham surgery was performed for another 9 macaques (only  
161 the catheter inserted into the uterine cavity, without the 3-DGIUD placement). Then  
162 the incision of the uterus was sutured with absorbable sutures (Figure 2 D), and  
163 macaques received prophylactic antibiotics (Cefazolin, 30 mg/kg).

164

#### 165 **Treatment phase and ultrasonography**

166 On the 10<sup>th</sup>-day after operation, 18 female macaques in the 3-DGIUD group (n=9) and  
167 the sham operation group (n=9) were coupled with fertile male macaques (1:1) to  
168 observe the effect of contraception of the 3-DGIUD. Two macaques in the 3-DGIUD  
169 group and one macaque in control group (No. 1, without surgery) were  
170 hysterectomized at third-month. On 12 months after the 3-DGIUD placement, 6  
171 macaques in the 3-DGIUD group and 1 macaque in control group (No. 2, without  
172 surgery) undergo hysterectomy.

173 Abdominal ultrasound was performed for 18 macaques in the 3-DGIUD group and  
174 the sham operation group every month, to check the uterus, 3-DGIUD and pregnancy.

175 For ultrasonography, we used an X300PE (Siemens, Germany) machine with a  
176 3.5-MHz (VS 13-5, Siemens) probe.

177 After hysterectomy, the uterus was used for histology and immunohistochemistry  
178 and morphological studies. Several cross-sections (about 2 mm thick) were cut  
179 freehand from the lumen to the myometrial border with a razor blade under  
180 stereomicroscope magnification. These slices were processed further to assess  
181 histological development, steroid receptor immunocytochemistry and markers (PAX2)  
182 of proliferation. Steroid receptors (estrogen and progesterin receptor, ER and PR), and  
183 PAX2 described as below.

184

### 185 **Histology and immunohistochemistry**

186 Pathological examination was carried out to the endometrium. Samples for histology  
187 were fixed with a mixture of 2% glutaraldehyde and 3% paraformaldehyde, embedded  
188 in glycol methacrylate (GMA), sectioned, and stained with hematoxylin and eosin  
189 (HE). The expression of ER, PR and PAX2 were detected by immunohistochemistry  
190 of endometrium on 12 months after surgery. For immunohistochemistry, briefly,  
191 paraffin-embedded tissue sections were de-paraffinized with xylene and dehydrated  
192 through graded ethanol, and then their endogenous peroxidase activity was quenched  
193 with 3% hydrogen peroxide for 30 min. Antigen retrieval used 10 mM sodium citrate  
194 buffer for 2 min. Sections were washed with PBS (phosphate-buffered saline) and

195 blocked with goat serum for 15 min. Sections were incubated with blocking serum for  
196 20 min and then with the primary monoclonal anti-ER (1D-5; detects ER alpha,  
197 Biogenex, San Ramon, CA, USA) and anti-PR (JZB-39; courtesy of Geoffrey Greene,  
198 University of Chicago, detects PR-A and PR-B), and both were incubated overnight at  
199 4 °C, washed, and then were incubated for 20 min at room temperature with  
200 respective biotinylated goat anti-mouse/rabbit secondary antibody and biotinylated  
201 horseradish peroxidase complex both in the Ultra Sensitive™ SP (Mouse/Rabbit) IHC  
202 Kit (Maixin Bio). For PAX2, Sections were dried for 1 h at 65 °C before treatment  
203 procedure of deparaffinization, rehydration and epitope retrieval in the Pre-Treatment  
204 Module, PT-LINK (DAKO) at 95 °C for 20 min in 50 × Tris/EDTA buffer, pH 9.0.  
205 Before staining the sections, endogenous peroxidase was blocked. The antibodies  
206 used were against 6H2.1. After incubation, the reaction was visualized with the stain  
207 used: PAX2, clone: Z-RX2. Sections were counter-stained with hematoxylin.  
208 Appropriate negative controls including no primary antibody were also tested. The  
209 sections were incubated with DAB (3,3'-diaminobenzidine tetrahydrochloride) for  
210 5 min (Maixin Bio), washed under tap water and counterstained with hematoxylin to  
211 facilitate identification of cellular elements. The section was cover-slipped. Finally,  
212 the slides were observed by microscopy (Olympus).

213

## 214 **Statistical analysis**

215 The statistical analysis of the study was performed using an IBM SPSS (Version 22.0.  
216 Armonk, NY: IBM Corp.). Data were shown as the mean  $\pm$  SD. Parametric data were  
217 analyzed statistically using Student's *t*-tests. The exact Pearson Chi-Square test  
218 (Fisher's Exact Test) was used for the pregnant rate. The difference was considered  
219 statistically significant for *P* values  $<0.05$ .

220

## 221 **Results**

222

### 223 **Uterine corpus measurement results before operation and during surgery**

224 The weight, uterine corpus measurement (during surgery) and ultrasonography  
225 (before operation) were shown in Table 1. The mean weight and mean age of the  
226 3-DGIUD group (n=9) and the sham operation group (n=9) were  $6.4 \pm 1.0$  kg and  
227  $129.6 \pm 1.6$  months, and  $6.5 \pm 0.8$  kg and  $130.8 \pm 8.4$  months, respectively, no  
228 significant differences were found between both groups. The weight and age of  
229 another 2 female control macaques (without operation) were 5.9 kg and 127 months  
230 and 6.9 kg and 132 months, respectively. In longitudinal section, the uterus was  
231 shaped like an inverted pear (Figure 3 A and B), whereas in transverse section, it was  
232 triangular, with a well-defined border by ultrasound. The 3-DGIUD in the uterus  
233 shown strong echo, and longitudinal and transverse section were  $8 \times 6 \times 3$  mm (large)  
234 (Figure 3 C and D) and  $6 \times 4 \times 2$  mm (small) (Figure 3 E). The mean size of uterine

235 corpus of height, width and thickness during operation measured by caliper was 28.1  
236  $\pm 1.0$  mm,  $21.7 \pm 2.5$  mm and  $17.3 \pm 2.6$  mm in the 3-DGIUD group, and  $28.7 \pm 0.8$   
237 mm,  $22.8 \pm 2.8$  mm and  $17.3 \pm 1.6$  mm in control group ( $t=0.533$ ,  $1.153$  and  $0.000$ ,  
238 and  $P=0.609$ ,  $0.282$  and  $1.000$ ); the size of uterine corpus by ultrasound in  
239 longitudinal section and in transverse section was  $28.12 \pm 2.26$  mm,  $19.49 \pm 2.11$  mm  
240 and  $21.77 \pm 2.43$  mm in the 3-DGIUD group, and  $29.63 \pm 2.25$  mm,  $19.24 \pm 1.67$  mm  
241 and  $21.33 \pm 2.27$  mm in control group ( $t=1.240$ ,  $0.297$  and  $0.589$ , and  $P=0.250$ ,  $0.787$   
242 and  $0.572$ ), respectively.

243

#### 244 **Pregnancy and uterine measurement of rhesus macaques on 3 months and 12** 245 **months after surgery**

246 The large type of the 3-DGIUD was placed in 7 rhesus macaques and the small type  
247 was placed in 2 cases. After 3 months, the 3-DGIUD loss and pregnancy were found  
248 in one macaque (1/9, 11.1%), and this 3-DGIUD was small type. In the sham  
249 operation group, 6 and 3 macaques on 3 and 12 months after surgery were pregnant  
250 (Figure 3 F), respectively, and there was significant difference comparing with the  
251 3-DGIUD group ( $\chi^2 = 5.844$ ,  $P = 0.05$  and  $\chi^2 = 14.400$ ,  $P = 0.000$ ). Uterine  
252 measurement on 3 months and 12 months after surgery is shown in Table 2.

253

#### 254 **Changes in the histology**

255 No pelvic infection occurred in 18 rhesus macaques on 3 and 12 months after surgery.  
256 After hysterectomy, the uterus was cut open. It can be seen that the 3-DGIUD did not  
257 adhere to surrounding tissues or embed into myometrium (Figure 4 A). The  
258 endometria in the without operation macaque (No. 1, control) were typically straight  
259 tubular glands in a normal stroma (Figure 4 B). Pathological examination of uterus on  
260 3 months after the 3-DGIUD placement: Endometrial epithelium was intact (Figure 4  
261 C and D), interstitial cells were edema, short fusiform and dense. A small number of  
262 glands were curved and vacuole. The spiral artery was hyperplasia on 3 months after  
263 3-DGIUD placement (Figure 4 C). After the 3-DGIUD placement for 12 months,  
264 endometrial monolayer columnar epithelium was mostly intact, focal epithelial cells  
265 were loss with focal hemorrhage, and a few neutrophils infiltration were observed.  
266 Some glands secreted vacuoles. The vitreous degeneration was found in the basal  
267 layer and the superficial muscle layer; and the interstitial spiral arterioles developed  
268 well (Figure 4 D).

269

### 270 **Changes in the immunohistochemistry**

271 There was no difference in cell distribution and staining intensity of the expression of  
272 ER, PR and PAX2 between non-surgical rhesus macaque (No.2, control group) and  
273 the 3-DGIUD placement group. The Figure 5 illustrates representative examples of  
274 the ER, PR and PAX2 immunostaining of uterine sections of normal endometrium

275 (No. 2, control) (Figure 5 A, C and E) and the 3-DGIUD group (Figure 5 B, D and F).

276 The positive ER, PR and PAX2 were shown in the nuclear and cytoplasmic

277 immunostaining of endometrial glands. ER, PR and PAX2 expression status in

278 endometrium was normal (Figure 5 B, D and F). No loss, increase and decrease of

279 ER, PR and PAX2 protein expression were found.

280

## 281 **Discussion**

282

### 283 **Principal findings of the study**

284 We designed the shape of the 3-DGIUD by using nitinol wire, performed rhesus

285 macaque experiments, and investigated the changes in the uterus of rhesus macaques

286 in this study. The uterine shape and size of the rhesus macaque were similar to human

287 (only smaller than human). Macaques (non-human primate animal) may be the best

288 animal model for experiment of IUDs. We explored that the weight and uterine size of

289 macaques increased on 3 months and 12 months after the 3-DGIUD placement.

290 Changes in endometrial epithelium by the local oppression of the 3-DGIUD were

291 observed. No alterations were found in the expression of endometrial ER, PR and

292 PAX2 after the 3-DGIUD placement.

293



294 **Results of the study in the context of other observations**

295 **Materials of the frame of IUDs:** The frame of currently used IUD is made of  
296 stainless steel and plastic, and included copper or additional hormones [27,28]. The  
297 Cu (CuT380A) IUD is the only non-hormonal LARC device approved by the United  
298 States Food and Drug Administration (FDA) [29]. The Cu<sup>2+</sup> of Cu-IUD-releasing  
299 such as small T-shaped devices which made of flexible plastic, can kill sperm. The  
300 Cu-IUD is a LARC (up to twelve years), however some women discontinue use due  
301 to undesired side effects such as pain or cramping and complaints of heavy bleeding  
302 [14-16,28]. The high rate of amenorrhea is often seen with the higher progestin  
303 devices [30,31]. In present study, the frame of the new 3-DGIUD is made of nitinol  
304 wire and silicone rubber. The nitinol wire is no toxic and used widely in clinical such  
305 as orthopedics, bone and cardiovascular stents. The nitinol frame was covered with  
306 silicone rubber, to prevent the 3-DGIUD from adhering to the endometrium. The  
307 metal copper and progestin are not used for the 3-DGIUD. These may avoid side  
308 effect of copper and hormone IUDs.

309 **Efficacy and side effects of IUDs:** Proper installation of IUD or IUD system will  
310 reduce adverse effects and improve acceptability, resulting in enhanced continuation  
311 of the IUD use [32]. Cramping pain, erratic bleeding or menorrhagia and expulsion of  
312 IUDs may be caused by the dimensional incompatibility. In the present study, the  
313 small type of 3-DGIUD was expulsion in one macaque at 3 months. The remaining 8  
314 macaques, no pregnancy occurred after surgery. Therefore, the size of IUD is too

315 small, easy to fall off, leading to pregnancy. On the other hand, menorrhagia,  
316 dislocation or expulsion and contraceptive efficacy may be affected by the shape and  
317 the weight of IUDs. If the shape is too large or the weight is too heavy of the IUD,  
318 severe compression will be caused. The rigidity of the inserted tube may also be  
319 linked to risks [33,34]. In the present study, we improved the shape of IUDs. The  
320 three-dimensional structure for macaques replaced the two-dimensional structure of  
321 the commonly used IUDs. The weight of the 3-DGIUD's frame was light. The space  
322 of uterine cavity was occupied by the 3-DGIUD and embryo implantation was  
323 interfered. Nitinol has a memory function, and can restore to the designed shape at  
324 body temperature. It has a good flexibility, may be conformed to the contraction and  
325 activity of the uterus, and avoided uterine perforation.

326 The contraceptive efficacy is very important for IUDs. Wu *et al.* reported [35] that  
327 the LNG-IUS placed in 3 monkeys, expulsion of device is found in one monkey. In  
328 human women, the expulsion rate of postpartum IUD varies according to the  
329 placement time, delivery method, and the type of IUDs, ranging from 1.9% to 29.7%  
330 [36-39], while removal rates are 3.6% to 19.3% due to associate side effects  
331 (bleeding, pain and discharge) [36,38].

332

### 333 **Clinical implications of the study**

334 **Effects of IUDs on the uterus:** Wang et al. [40] reported that the chronic endometrial

335 inflammation of histologic features occurs after placement a bare copper wire to  
336 contraception in the uterus of rhesus macaques. The chronic and non-specific  
337 endometrial inflammation may be one of contraceptive effects of the Cu-IUD. The  
338 strong local inflammatory response is induced by LNG-IUS for the transplant  
339 recipients as in the healthy control [41].

340 **The detection of ER, PR and PAX2 expression can be used to predict the**  
341 **response of endometrial hyperplasia and cancer for IUD use:** Two studies  
342 reported that IUD has nothing to do with the increased risk of breast cancer [42,43],  
343 whereas other studies reported that IUDs are associated with an increased risk of  
344 breast cancer [44,45]. In the LNG-IUS used patients, the recurrence and formation of  
345 endometrial polyp may be inhibited through lowering the expression of ER and PR  
346 [46]. The LNG-IUS can reduce the expression of ER and PR in endometrium and  
347 inhibit endometrial proliferation [47]. When the conservative treatment with LNG  
348 -IUS failed, the expression of PR and ER of these patients were higher [48]. The  
349 complete down-regulation of PR and ER expression in uterine glands and stroma is  
350 caused by the LNG-IUS in human endometrial hyperplasia [49]. The LNG released  
351 locally from the IUD has a depressive effect on the ER and PR, which may contribute  
352 to the contraceptive effect of this type of IUD and may also be the causes of  
353 LNG-IUS-induced irregular bleeding and amenorrhoea [50]. In this study, PAX2  
354 expression was normal, and there was no decrease, loss or over-expression after  
355 placement 3-DGIUD. PAX2 is a downstream gene in the steroid hormone receptor

356 signal pathway. It is over-expressed in endometrial cancer and benign endometrial  
357 hyperplasia [51]. Recently, Monte et al. [23] and Quick et al. [25] reported that PAX2  
358 deficiency in up to 77% of endometrial adenocarcinoma and 71% of patients with  
359 atypical endometrial hyperplasia. As an oncogene involves in the development of  
360 endometrial cancer, the expression of PAX2 is increased in the neoplastic lesion  
361 progresses from a premalignant state to endometrial cancer. Knock-down of PAX2  
362 may lead to the decrease of cell viability, invasion and migration, while PAX2  
363 over-expression causes to the opposite effects. PAX2 acts as a tumor suppressor in  
364 proliferative and self-renewing endometrial epithelial cells [23].

365

### 366 **Research implications**

367 **Unanswered questions:** Birth control plays pivotal roles in the reduction of maternal,  
368 infant, and child mortality. As the main method of contraception, IUD is the focus of  
369 clinical research. Questions relating to the risks of IUD use remain unanswered. The  
370 material, size and shape of the IUD have significant impacts on contraceptive  
371 efficacy, and side effects may be avoided or decreased by changes in the shape and  
372 materials of IUDs. The size of IUDs is too small to be expelled [33,34]. In the present  
373 study, a small type of 3-DGIUD was expelled from the uterus after 3 months.

374 **Proposals for future research:** Contraceptive effectiveness and side effects of  
375 IUDs should be studied by improvement of the material and the shape of IUDs. The

376 material IUDs must be non-toxic and to fit for the uterus.

377

378 **Conclusion**

379 In conclusion, despite the 3-DGIUD was developed for macaques, it is likely that  
380 improvement of the shape and the materials for currently used IUD of human  
381 according to this study. The 3-DGIUD was non-toxic and had good contraceptive  
382 effectiveness for macaques.

383

384 **Funding Statement**

385 The author(s) received no specific funding for this work.

386

387 **Data Availability**

388 All relevant data are within the paper and its Supporting Information files.

389 **References**

- 390 [1]. Finer LB, Zolna MR. Declines in unintended pregnancy in the United States, 2008-2011. *N*  
391 *Engl J Med*. 2016;374(9):843–852.
- 392 [2]. Ding R, Guo C, Song X, Zheng X. Male knowledge, attitude and practice and partner  
393 pregnancy among Chinese unmarried youth. *PLoS One*. 2019;14(3):e0214452.
- 394 [3]. Liu J, Wu S, Xu J, Temmerman M, Zhang WH; INPAC Group. Is repeat abortion a public  
395 health problem among Chinese adolescents? A cross-sectional survey in 30 provinces. *Int J*  
396 *Environ Res Public Health*. 2019;16(5). pii: E794.
- 397 [4]. Dina B, Peipert LJ, Zhao Q, Peipert JF. Anticipated pain as a predictor of discomfort with  
398 intrauterine device placement. *Am J Obstet Gynecol*. 2018;218(2):236.e1-236.e9.
- 399 [5]. Huang Z, Gao Y, Wen W, Li H, Zheng W, Shu XO, Beeghly-Fadiel A. Contraceptive  
400 methods and ovarian cancer risk among Chinese women: A report from the Shanghai women's  
401 health study. *Int J Cancer*. 2015;137(3):607-614.
- 402 [6]. Bednarek PH, Creinin MD, Reeves MF, Cwiak C, Espey E, Jensen JT; Post-Aspiration IUD  
403 Randomization (PAIR) Study Trial Group. Immediate versus delayed IUD insertion after  
404 uterine aspiration. *N Engl J Med* 2011;364:2208–2217.
- 405 [7]. Eggebrotten JL, Sanders JN, Turok DK. Immediate postpartum intrauterine device and implant  
406 program outcomes: a prospective analysis. *Am J Obstet Gynecol*. 2017;217(1):51.e1-51.e7.
- 407 [8]. Wang C. Trends in contraceptive use and determinants of choice in China: 1980–2010.  
408 *Contraception*. 2012;85:570–579.
- 409 [9]. Shabaik SA, Awaida JY, Xandre P, Nelson AL. Contraceptive beliefs and practices of  
410 American Muslim women. *J Womens Health (Larchmt)*. 2019;22.
- 411 [10]. Hamy AS, Abuelallah H, Hocini H, Coussy F, Gorins A, Serfaty D, Tournant B, Perret F,  
412 Bonfils S, Giacchetti S, Cuvier C, Espie M. Contraception after breast cancer: a retrospective  
413 review of the practice among French gynecologists in the 2000's. *Eur J Gynaecol Oncol*.  
414 2014;35(2):149-153.
- 415 [11]. Hubacher D, Chen PL, Park S. Side effects from the copper IUD: do they decrease over  
416 time? *Contraception*. 2009;79(5):556-562.
- 417 [12]. GoldstuckND, Wildemeersch D. Role of uterine forces in intrauterine device embedment,  
418 perforation, and expulsion. *Int J Womens Health*. 2014; 6: 735–744.
- 419 [13]. Sano M, Nemoto K, Miura T, Suzuki Y. Endoscopic treatment of intrauterine device  
420 migration into the bladder with stone formation. *Endourol Case Rep*. 2017;3(1):105-107.
- 421 [14]. Mathew MS, Davis J, Joseph K. Green synthesis of a plant-derived protein protected copper

- 422 quantum cluster for intrauterine device application. *Analyst*. 2018;143(16):3841-3849.
- 423 [15]. Ramakrishnan R, B B, Aprem AS. Controlled release of copper from an intrauterine device  
424 using a biodegradable polymer. *Contraception*. 2015;92(6):585-588.
- 425 [16]. Zhang S, Li Y, Yu P, Chen T, Zhou W, Zhang W, Liu J. In vitro release of cupric ion from  
426 intrauterine devices: influence of frame, shape, copper surface area and indomethacin. *Biomed*  
427 *Microdevices*. 2015;17(1):19.
- 428 [17]. Beckert V, Ahlers C, Frenz AK, Gerlinger C, Bannemerschult R, Lukkari-Lax E. Bleeding  
429 patterns with the 19.5 mg LNG-IUS, with special focus on the first year of use: implications  
430 for counselling. *Eur J Contracept Reprod Health Care*. 2019;24(4):251-259.
- 431 [18]. Papaikonomou K, Kopp Kallner H, Söderdahl F, Gemzell-Danielsson K. Mifepristone  
432 treatment prior to insertion of a levonorgestrel releasing intrauterine system for improved  
433 bleeding control - a randomized controlled trial. *Hum Reprod*. 2018;33(11):2002-2009.
- 434 [19]. Ortiz ME, Croxatto HB, Bardin CW. Mechanisms of action of intrauterine devices.  
435 *ObstetGynecolSurv*. 1996;51(12 Suppl):S42-51.
- 436 [20]. Reinprayoon D, Taneepanichskul S, Niruthisard S, Suwajanakon S. Uterine histopathologic  
437 changes after Cu-Fix intrauterine device insertion. *Contraception*. 1999;59(1):63-65.
- 438 [21]. Critchley HO, Wang H, Jones RL, Kelly RW, Drudy TA, Gebbie AE, Buckley CH, McNeilly  
439 AS, Glasier AF. Morphological and functional features of endometrial decidualization fo  
440 llowing long-term intrauterine levonorgestrel delivery. *Hum Reprod*. 1998;13(5):1218-1224.
- 441 [22]. Guttinger A, Critchley HO. Endometrial effects of intrauterine levonorgestrel.  
442 *Contraception*. 2007;75(6 Suppl):S93-98.
- 443 [23]. Monte NM, Webster KA, Neuberg D, Dressler GR, Mutter GL. Joint loss of PAX2 and  
444 PTEN expression in endometrial precancers and cancer. *Cancer Res*. 2010;70(15):6225-6232.
- 445 [24]. Joiner AK, Quick CM, Jeffus SK. Pax2 expression in simultaneously diagnosed WHO and  
446 EIN classification systems. *Int J Gynecol Pathol*. 2015;34(1):40-6.
- 447 [25]. Quick CM, Laury AR, Monte NM, Mutter GL. Utility of PAX2 as a marker for diagnosis of  
448 endometrial intraepithelial neoplasia. *Am J Clin Pathol*. 2012;138(5):678-684.
- 449 [26]. Qiu Y, Wang LG, Zhang MH, Zhang YP, Zhang AD, Yang DT. A new experimental  
450 three-dimensional, reticular intrauterine device (3-DRIUD) composed of nitinol and silicone  
451 rubber. *Contraception*. 2013;88(1):31-36.
- 452 [27]. Gemzell-Danielsson K, Schellschmidt I, Apter D. A randomized, phase II study describing  
453 the efficacy, bleeding profile, and safety of two low-dose levonorgestrel-releasing intrauterine  
454 contraceptive systems and Mirena. *FertilSteril*. 2012;97:616-622.
- 455 [28]. Costescu DJ. Levonorgestrel-releasing intrauterine systems for long-acting contraception:

- 456 current perspectives, safety, and patient counseling. *Int J Womens Health*. 2016;8:589-598.
- 457 [29]. Sanders JN, Adkins DE, Kaur S, Storck K, Gawron LM, Turok DK. Bleeding, cramping, and  
458 satisfaction among new copper IUD users: A prospective study. *PLoS One*.  
459 2018;13(11):e0199724.
- 460 [30]. Nelson AL. LNG-IUS 12: a 19.5 levonorgestrel-releasing intrauterine system for prevention  
461 of pregnancy for up to five years. *Expert Opin Drug Deliv*. 2017;14(9):1131-1140.
- 462 [31]. Parks C, Peipert JF. Eliminating health disparities in unintended pregnancy with long-acting  
463 reversible contraception (LARC). *Am J Obstet Gynecol*. 2016;214(6):681-688.
- 464 [32]. Wildemeersch D, Hasskamp T, Nolte K, Jandi S, Pett A, Linden S, van Santen M, Julen O.  
465 A multicenter study assessing uterine cavity width in over 400 nulliparous women seeking  
466 IUD insertion using 2D and 3D sonography. *Eur J ObstetGynecolReprod Biol*.  
467 2016;206:232-238.
- 468 [33]. Toumi O, Ammar H, Ghdira A, et al. Pelvic abscess complicating sigmoid colon perforation  
469 by migrating intrauterine device: a case report and review of the literature. *Int J Surg Case*  
470 *Rep* 2018;42:60–63.
- 471 [34]. Harrison-Woolrych M, Ashton J, Coulter D. Uterine perforation on intrauterine device  
472 insertion: is the incidence higher than previously reported? *Contraception* 2003;67:53–56.
- 473 [35]. Wu C, Xia W, Wu X, Li R, Huang X, Yan Y, Huang D. Effect of domestically-made  
474 levonorgestrel-releasing intrauterine device on the endocrine system and menstruation in  
475 monkeys. *J Tongji Med Univ*. 1996;16(2):117-120.
- 476 [36]. Makins A, Taghinejadi N, Sethi M, Machiyama K, Munganyizi P, Odongo E, Divakar H,  
477 Fatima P, Thapa K, Perera G, Arulkumaran S. FIGO postpartum intrauterine device initiative:  
478 Complication rates across six countries. *Int J Gynaecol Obstet*. 2018;143 Suppl 1:20-27.
- 479 [37]. Jatlaoui TC, Whiteman MK, Jeng G, Tepper NK, Berry-Bibee E, Jamieson DJ, Marchbanks  
480 PA, Curtis KM. Intrauterine Device Expulsion After Postpartum Placement: A Systematic  
481 Review and Meta-analysis. *Obstet Gynecol*. 2018;132(4):895-905.
- 482 [38]. Schnyer AN, Jensen JT, Edelman A, Han L. Do menstrual cups increase risk of IUD  
483 expulsion? A survey of self-reported IUD and menstrual hygiene product use in the United  
484 States. *Eur J Contracept Reprod Health Care*. 2019;23:1-5.
- 485 [39]. Kumar S, Srivastava A, Sharma S, Yadav V, Mittal A, Kim YM, Nash-Mercado A,  
486 Reijneveld SA, Sood B. One-year continuation of postpartum intrauterine contraceptive  
487 device: findings from a retrospective cohort study in India. *Contraception*.  
488 2019;99(4):212-216.
- 489 [40]. Wang YY, Hu SF, Rao M, Xia XP, Xia W, Zhu CH. Antifertility effectiveness of a novel  
490 polymer matrix composite and its influence on the endometrium in rhesus macaques (*Macaca*



- 491 mulatta). *Contraception*. 2019;100(2):132-136.
- 492 [41]. Kim CR, Martinez-Maza O, Magpantay L, Magyar C, Gornbein J, Rible R, Sullivan P.  
493 Immunologic evaluation of the endometrium with a levonorgestrel intrauterine device in solid  
494 organ transplant women and healthy controls. *Contraception*. 2016;94(5):534-540.
- 495 [42]. Backman T, Rauramo I, Jaakkola K, Inki P, Vaahtera K, Launonen A, Koskenvuo M. Use of  
496 the levonorgestrel-releasing intrauterine system and breast cancer. *Obstet*  
497 *Gynecol*. 2005;106(4):813–817.
- 498 [43]. Fu Y, Zhuang Z. Long-term effects of levonorgestrel-releasing intrauterine system on  
499 tamoxifen-treated breast cancer patients: a meta-analysis. *Int J Clin Exp Pathol*.  
500 2014;7(10):6419-6429.
- 501 [44]. Lyytinen HK, Dyba T, Ylikorkala O, Pukkala EI. A case-control study on hormone therapy  
502 as a risk factor for breast cancer in Finland: intrauterine system carries a risk as well. *Int J*  
503 *Cancer*. 2010;126(2):483–9.
- 504 [45]. Soini T, Hurskainen R, Grenman S, Maenpaa J, Paavonen J, Joensuu H, Pukkala E.  
505 Levonorgestrel-releasing intrauterine system and the risk of breast cancer: A nationwide  
506 cohort study. *Acta Oncol*. 2016;55(2):188–192.
- 507 [46]. Wu X, Liu X, Jin X, Xu X. Effects of levonorgestrel intrauterine system on the expressions  
508 of estrogen receptor, progesterone receptor and insulin-like growth factor-1. *Zhonghua Yi Xue*  
509 *Za Zhi*. 2014;94(35):2763-2765.
- 510 [47]. Weng M, Li L, Feng S, Xie M, Hong S. Effects of levonorgestrel-releasing intrauterine  
511 system on endometrial estrogen and progesterone receptors in patients with endometrial  
512 hyperplasia. *Nan Fang Yi Ke Da Xue Xue Bao*. 2012 Sep;32(9):1350-1354.
- 513 [48]. Reyes HD, Carlson MJ, Devor EJ, Zhang Y, Thiel KW, Samuelson MI, McDonald M, Yang  
514 S, Stephan JM, Savage EC, Dai D, Goodheart MJ, Leslie KK. Down regulation of FOXO1  
515 mRNA levels predicts treatment failure in patients with endometrial pathology conservatively  
516 managed with progestin-containing intrauterine devices. *Gynecol Oncol*.  
517 2016;140(1):152-160.
- 518 [49]. Vereide AB, Kaino T, Sager G, Arnes M, Ørbo A. Effect of levonorgestrel IUD and oral  
519 medroxyprogesterone acetate on glandular and stromal progesterone receptors (PRA and  
520 PRB), and estrogen receptors (ER-alpha and ER-beta) in human endometrial hyperplasia.  
521 *Gynecol Oncol*. 2006;101(2):214-223.
- 522 [50]. Critchley HO, Wang H, Kelly RW, Gebbie AE, Glasier AF. Progestin receptor isoforms and  
523 prostaglandin dehydrogenase in the endometrium of women using a levonorgestrel-releasing  
524 intrauterine system. *Hum Reprod*. 1998;13(5):1210-1217.
- 525 [51]. Harshman LA, Brophy PD. PAX2 in human kidney malformations and  
526 disease. *PediatrNephrol*. 2012;27:1265–1275

527

528

529 **Tables in text**

530 Table 1. The weight and uterine size by ultrasound before and during surgery

| 531 | Weight     | <u>Uterine size (mm) *</u> |               |              | <u>Ultrasound (mm) *</u> |                     |                   |                |     |
|-----|------------|----------------------------|---------------|--------------|--------------------------|---------------------|-------------------|----------------|-----|
| 532 | <u>No.</u> | <u>(kg)</u>                | <u>height</u> | <u>width</u> | <u>thickness</u>         | <u>longitudinal</u> | <u>transverse</u> | <u>3-DGIUD</u> |     |
| 533 | 1          | 6.45                       | 22            | 18           | 15                       | 26.6                | 18.8              | 20.9           | yes |
| 534 | 2          | 5.50                       | 28            | 24           | 16                       | 27.3                | 18.5              | 18.5           | yes |
| 535 | 3          | 8.50                       | 32            | 22           | 17                       | 27.5                | 20.8              | 21.2           | yes |
| 536 | 4          | 6.10                       | 26            | 22           | 15                       | 26.9                | 16.6              | 18.2           | yes |
| 537 | 5          | 6.10                       | 29            | 20           | 17                       | 29.6                | 18.8              | 23.4           | yes |
| 538 | 6          | 7.10                       | 27            | 22           | 18                       | 30.6                | 20.6              | 23.5           | yes |
| 539 | 7          | 6.85                       | 32            | 24           | 21                       | 32.5                | 220               | 24.1           | yes |
| 540 | 8          | 5.25                       | 25            | 18           | 15                       | 25.9                | 16.8              | 21.0           | yes |
| 541 | 9          | 5.75                       | 32            | 25           | 22                       | 26.2                | 22.5              | 25.1           | yes |
| 542 | 10         | 6.30                       | 28            | 24           | 16                       | 28.6                | 18.2              | 22.0           | no  |
| 543 | 11         | 7.20                       | 28            | 22           | 17                       | 30.8                | 20.7              | 21.0           | no  |
| 544 | 12         | 7.32                       | 32            | 25           | 18                       | 32.8                | 20.8              | 21.7           | no  |

|     |           |             |           |           |           |             |             |             |           |
|-----|-----------|-------------|-----------|-----------|-----------|-------------|-------------|-------------|-----------|
| 545 | 13        | 6.20        | 25        | 22        | 16        | 27.8        | 19.0        | 18.0        | no        |
| 546 | 14        | 5.90        | 28        | 20        | 18        | 28.8        | 20.7        | 19.0        | no        |
| 547 | 15        | 6.25        | 31        | 26        | 19        | 29.5        | 20.1        | 25.0        | no        |
| 548 | 16        | 5.30        | 27        | 21        | 15        | 27.5        | 16.1        | 21.0        | no        |
| 549 | 17        | 6.33        | 26        | 20        | 17        | 27.8        | 17.5        | 20.0        | no        |
| 550 | <u>18</u> | <u>8.10</u> | <u>33</u> | <u>23</u> | <u>20</u> | <u>33.5</u> | <u>20.1</u> | <u>24.3</u> | <u>no</u> |

551 \*Measured the uterine corpus, not included the cervix. The number 1-9 was in the  
 552 experimental group (3-DGIUD) and the number 10-18 was in the sham operation.

553

554

555 Table 2. Weight and uterine size of macaques on 3 and 12 months after surgery

| 556 |                     | <u>During operation</u> | <u>After 3 Months</u>      | <u>After 12 Months</u>      |
|-----|---------------------|-------------------------|----------------------------|-----------------------------|
| 557 | Weight (kg)         | 6.4 ± 1.1 (8)           | 6.7 ± 1.0 (8) <sup>a</sup> | 6.8 ± 1.2 (6) <sup>b</sup>  |
| 558 | Uterine corpus (mm) |                         |                            |                             |
| 559 | Height              | 27.5 ± 4.0 (6)          |                            | 31.3 ± 5.1 (6) <sup>c</sup> |
| 560 | Width               | 21.5 ± 1.0 (6)          |                            | 23.2 ± 3.2 (6) <sup>d</sup> |
| 561 | Thickness           | 16.7 ± 2.7 (6)          |                            | 18.7 ± 2.3 (6) <sup>e</sup> |

|     |                 |                  |                             |
|-----|-----------------|------------------|-----------------------------|
| 562 | Ultrasound (mm) | Before operation |                             |
| 563 | Longitudinal-1  | 28.3 ± 2.4 (8)   | 29.1 ± 2.3 (8) <sup>f</sup> |
| 564 | Longitudinal-2  | 19.9 ± 1.9 (8)   | 20.0 ± 2.1 (8) <sup>g</sup> |
| 565 | Transverse      | 22.2 ± 2.1 (8)   | 28.5 ± 2.1 (8) <sup>h</sup> |

---

566 Notes: The number in brackets is the rhesus macaques (n). Superscript letter a-e was  
567 compared with during operation and f-h was compared with before operation; <sup>a</sup>  $t =$   
568 1.991,  $P = 0.087$ , <sup>b</sup>  $t = 4.812$ ,  $P = 0.005$ ; <sup>c</sup>  $t = 3.557$ ,  $P = 0.016$ ; <sup>d</sup>  $t = 7.906$ ,  $P = 0.001$ ; <sup>e</sup>  
569  $t = 5.477$ ,  $P = 0.003$ ; <sup>f</sup>  $t = 7.112$ ,  $P = 0.000$ ; <sup>g</sup>  $t = 2.333$ ,  $P = 0.052$ ; <sup>h</sup>  $t = 6.563$ ,  $P =$   
570 0.000. Fisher's Exact Test.

571

572

### 573 **Figure legends**

574

575 Figure 1. Design and manufacture of the novel three-dimensional grid intrauterine  
576 device (3-DGIUD) for rhesus macaques. (A) Designed map of 3-DGIUD. (B) Actual  
577 3-DGIUD, two types, large and small. (C) Inserters with the 3-DGIUD for rhesus  
578 macaques. (D) Measured 3-DGIUD size.

579

580 Figure 2. Placement of 3-DGIUD. (a) The lower abdominal incision. (b) Measuring  
581 the uterine size. (c) A catheter inserted into the uterine cavity. (d) After placement of  
582 3-DGIUD, the incision in the uterus was sutured.

583

584 Figure 3. The uterine ultrasound of rhesus macaques. (A) and (B), before surgery, the  
585 longitudinal section and the transverse section. (C) and (D), one month and 3 months  
586 after surgery, strong echo of the large type of 3-DGIUD. (E), the small type of  
587 3-DGIUD in the uterine cavity. (F), pregnancy, fetal in the uterus.

588

589 Figure 4. The 3-DGIUD and endometrial histology of macaques. (A), the 3-DGIUD  
590 in the uterine cavity. (B), the uterine histology of the control (No.1, non-operation  
591 macaque) (20 × magnifications). (C), the uterine histology of macaque on 3 months  
592 after the 3-DGIUD placement (20 × magnifications). (D), the uterine histology of  
593 macaque on 12 months after the 3-DGIUD placement (25 × magnifications).

594

595

596 Figure 5. Uterine immunohistochemistry of the ER, PR and PAX2 on 12 months after  
597 surgery. (A), (C) and (E), non-operation macaque (No. 2, control). (B), (D) and (F),  
598 the 3-DGIUD group macaque. (A) and (B), the ER immunostaining, both were

599 similar. (C) and (D), the PR immunostaining, both were similar. (E) and (F), the  
600 PAX2 immunostaining, both were similar. All were 25 × magnifications.

bioRxiv preprint doi: <https://doi.org/10.1101/858886>; this version posted November 28, 2019. The copyright holder for this preprint (which was not certified by peer review) is the author/funder, who has granted bioRxiv a license to display the preprint in perpetuity. It is made available under aCC-BY 4.0 International license.

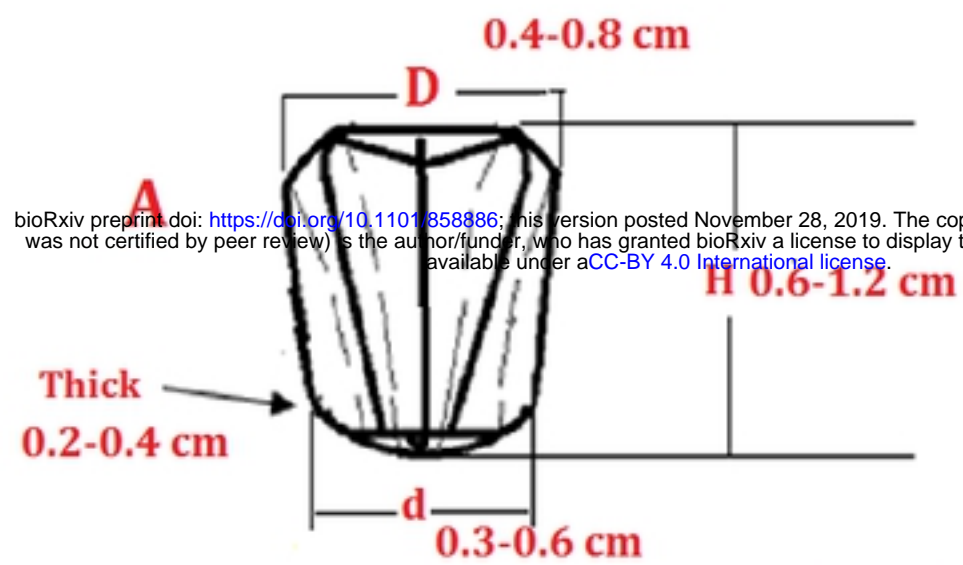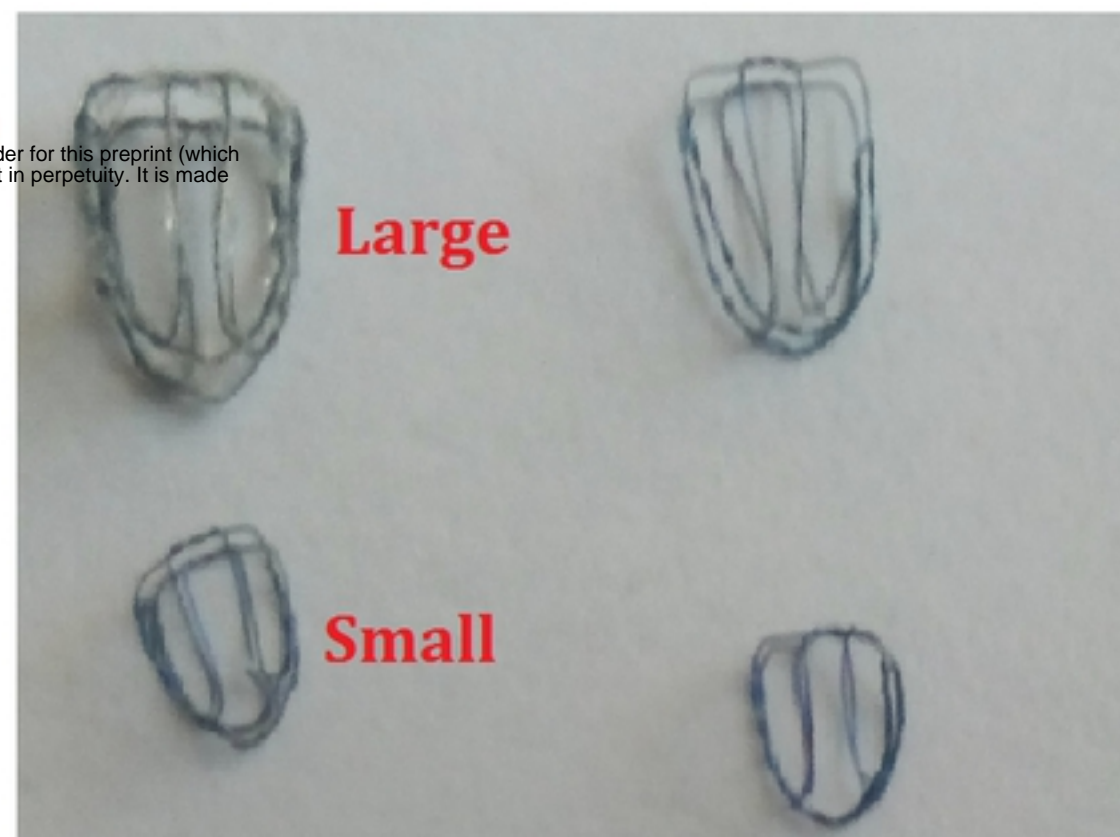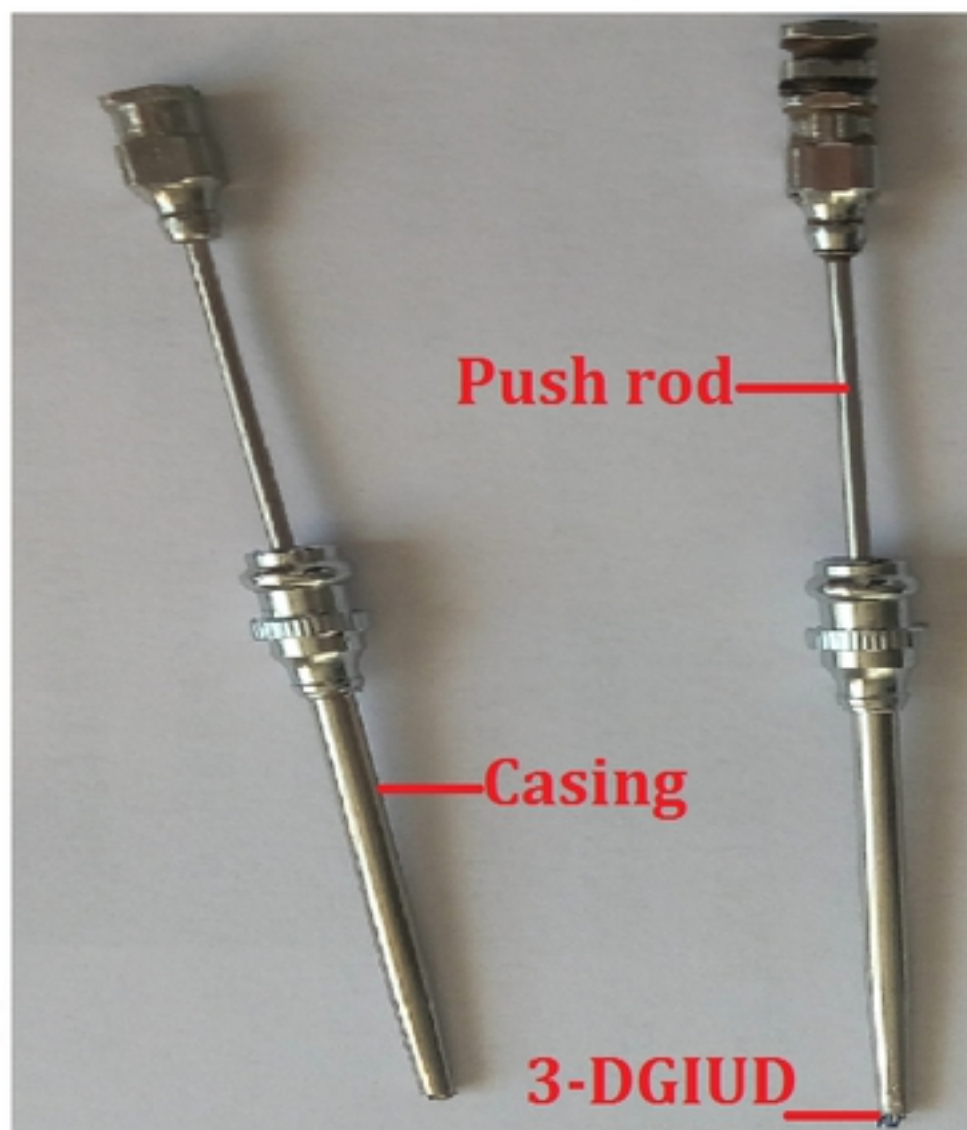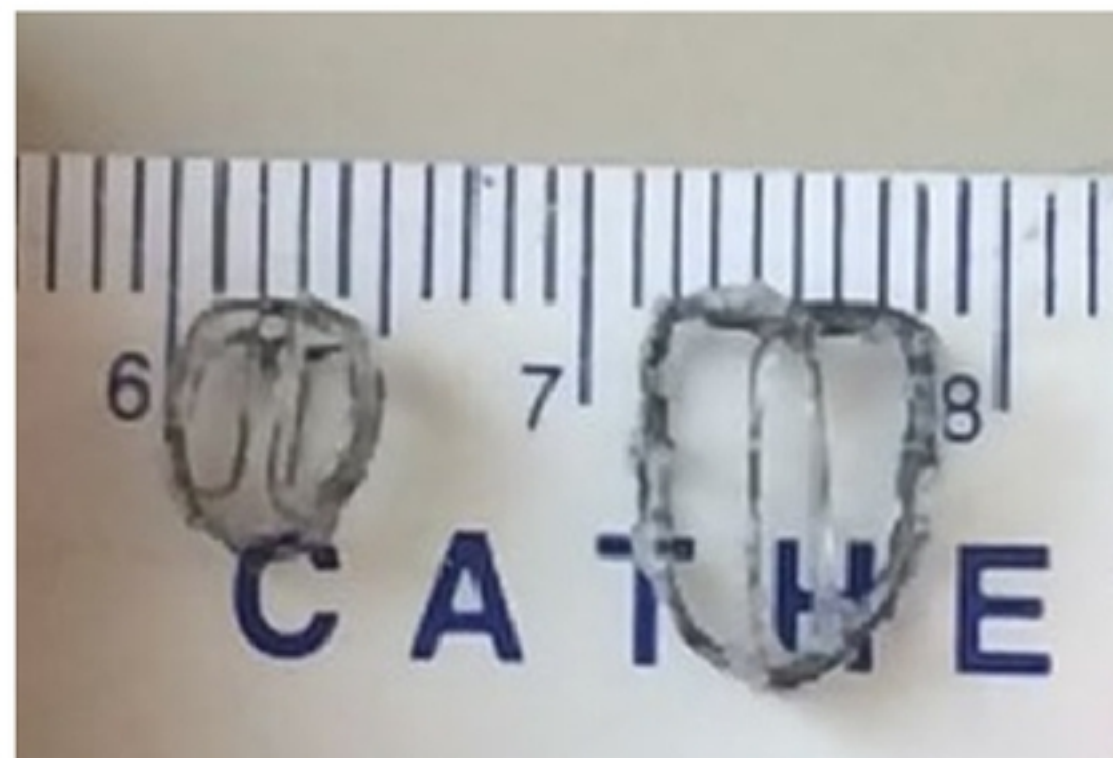

Figure



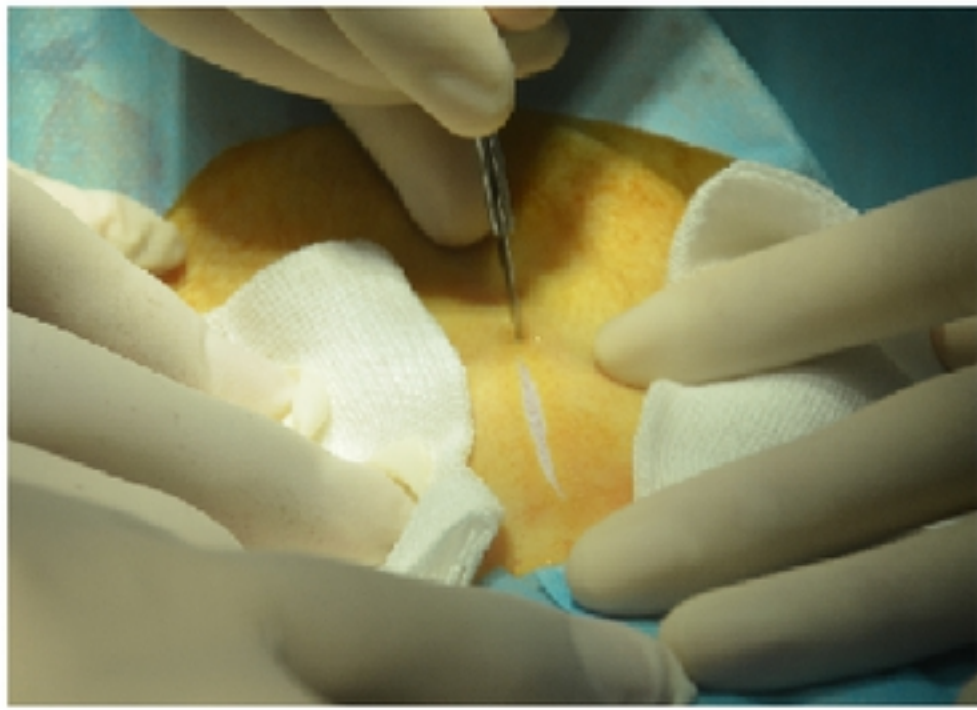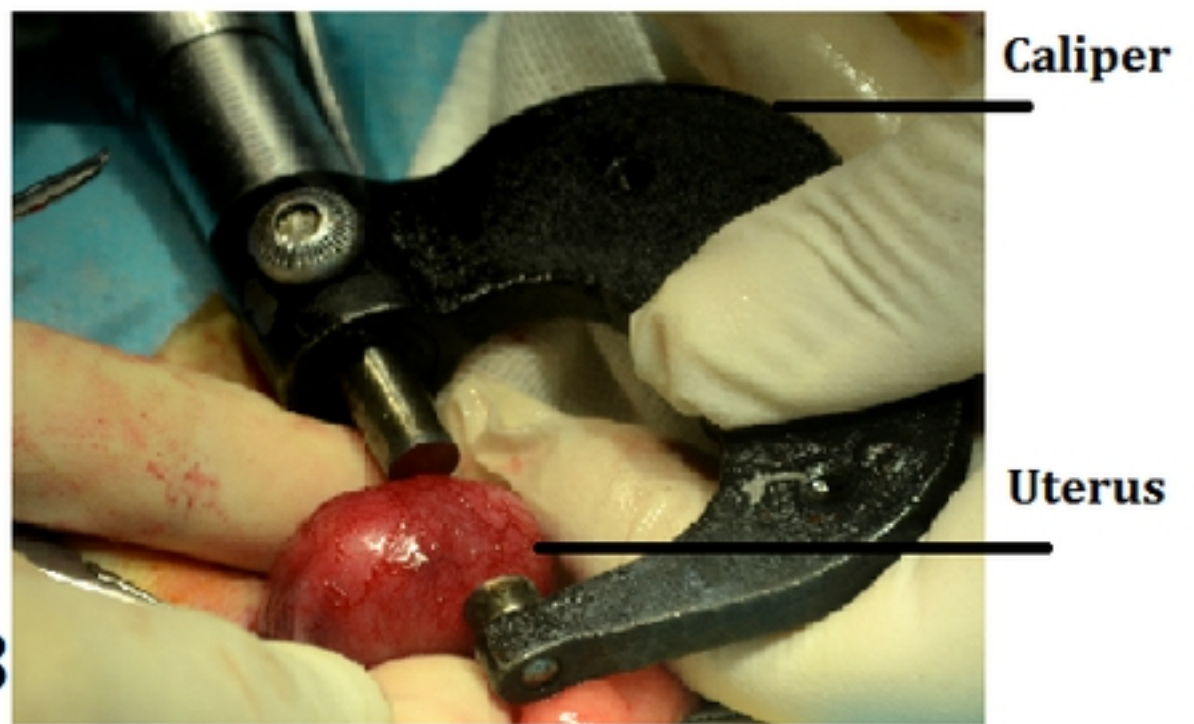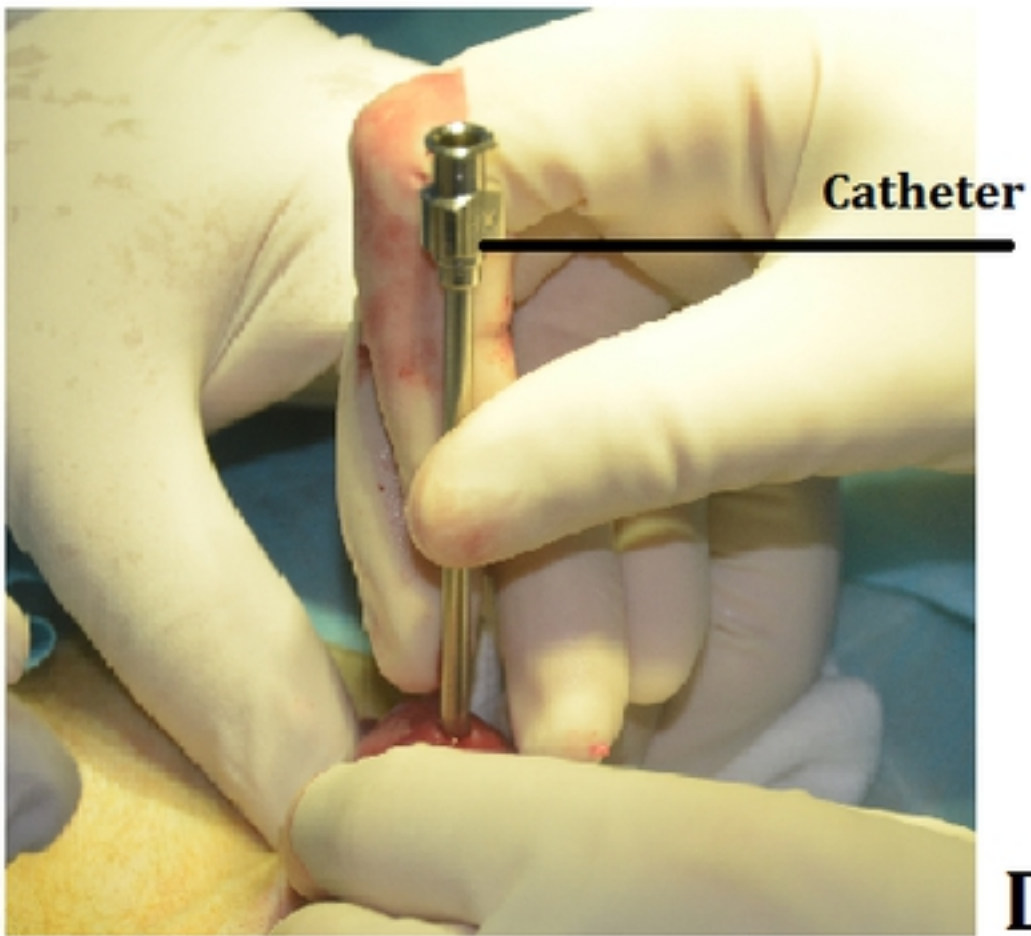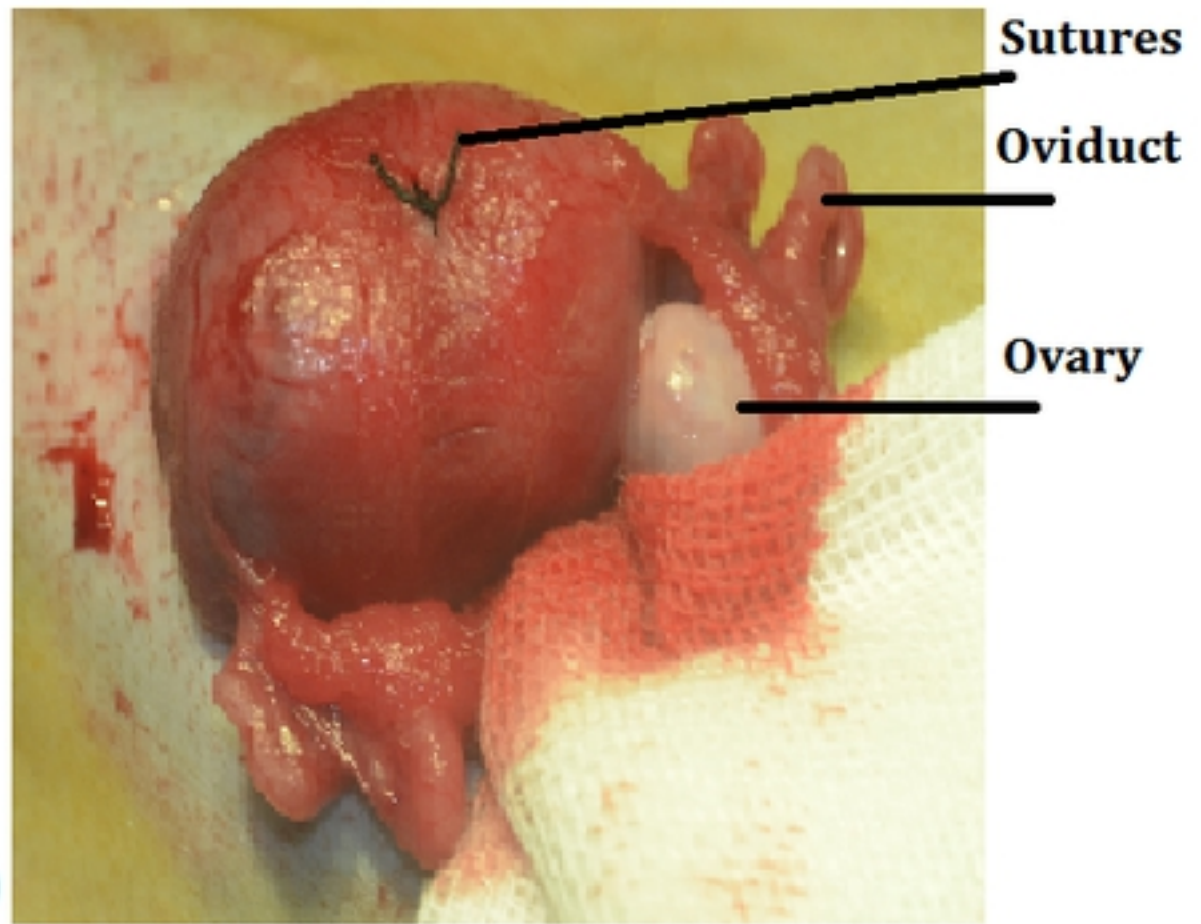

Figure

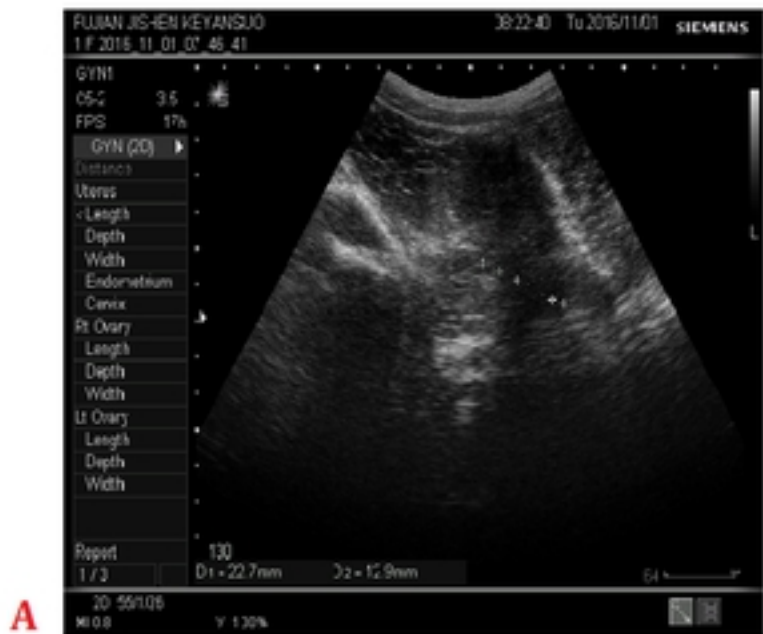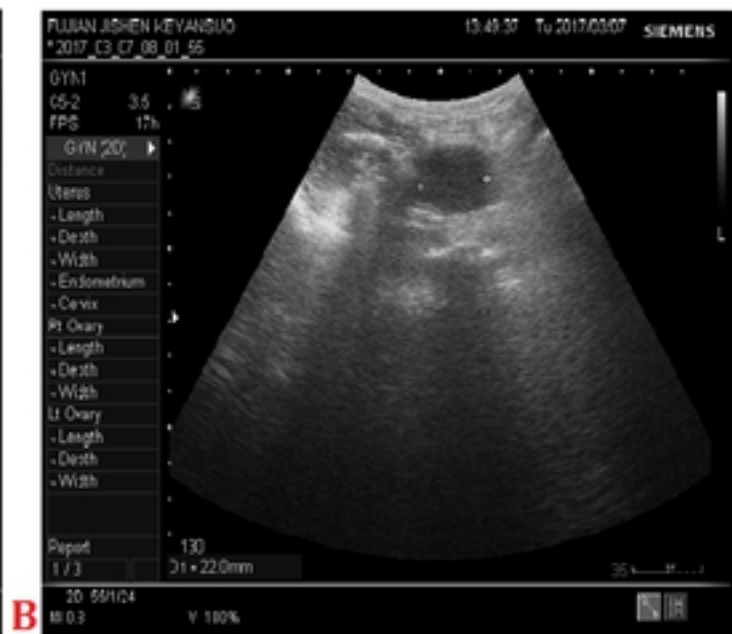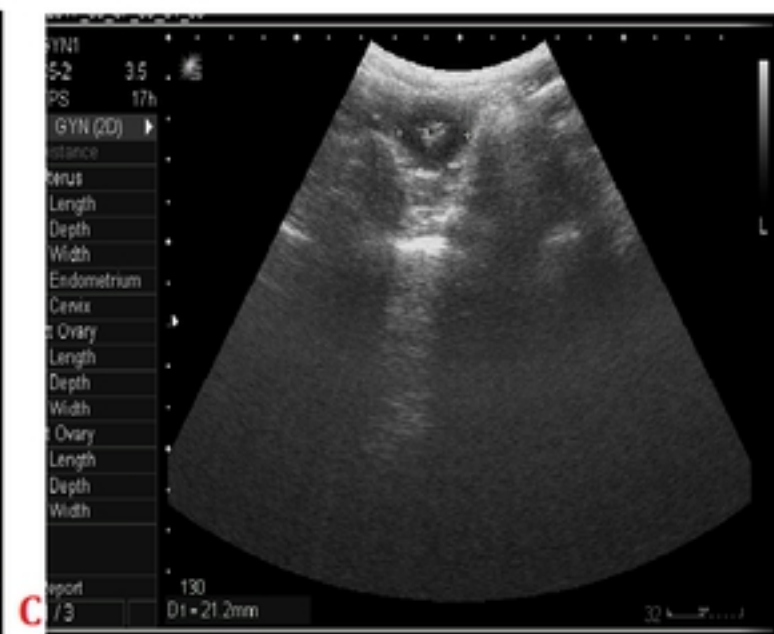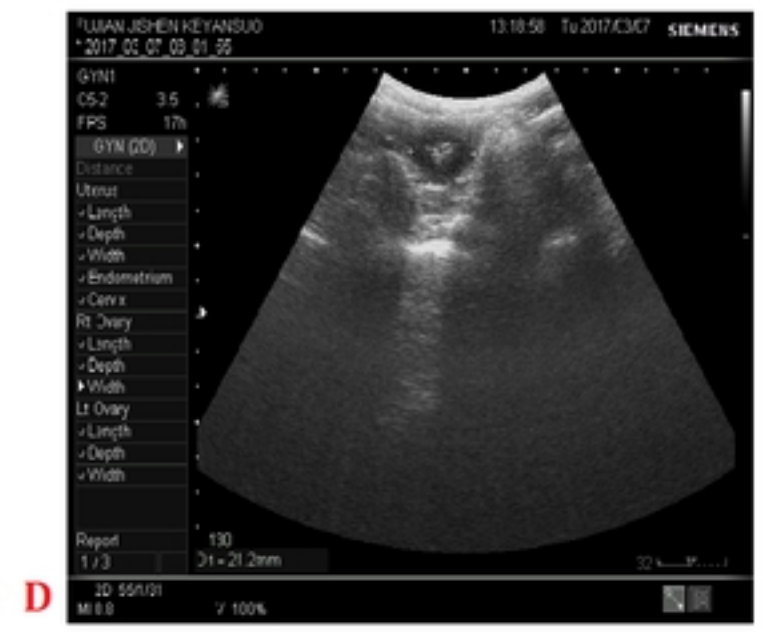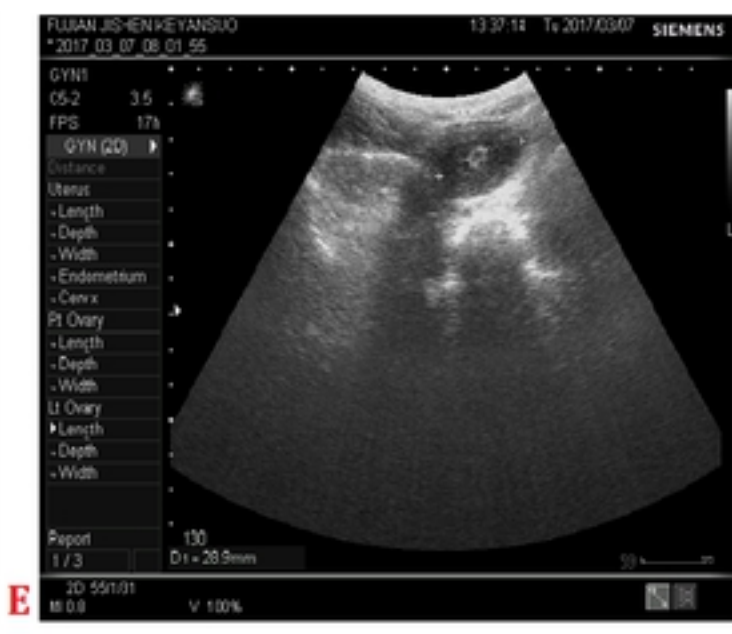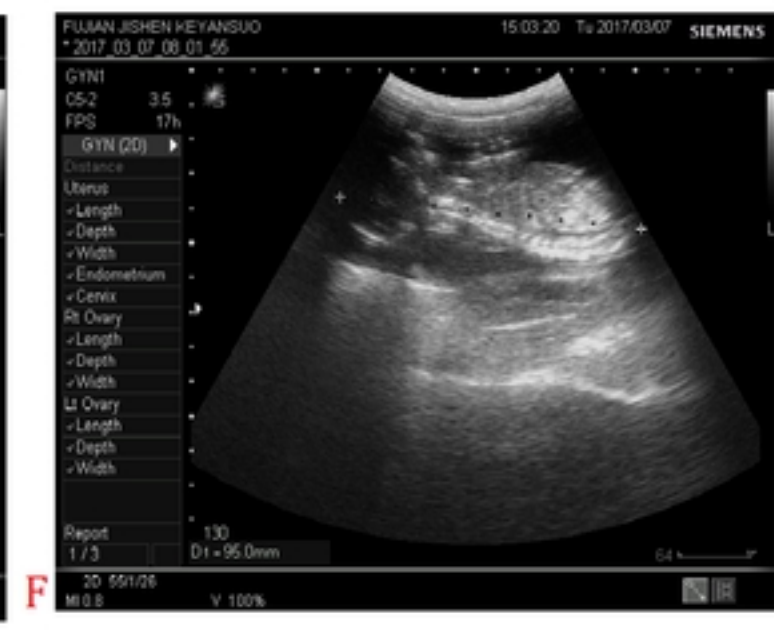

Figure



bioRxiv preprint doi: <https://doi.org/10.1101/858886>; this version posted November 28, 2019. The copyright holder for this preprint (which was not certified by peer review) is the author/funder, who has granted bioRxiv a license to display the preprint in perpetuity. It is made available under aCC-BY 4.0 International license.

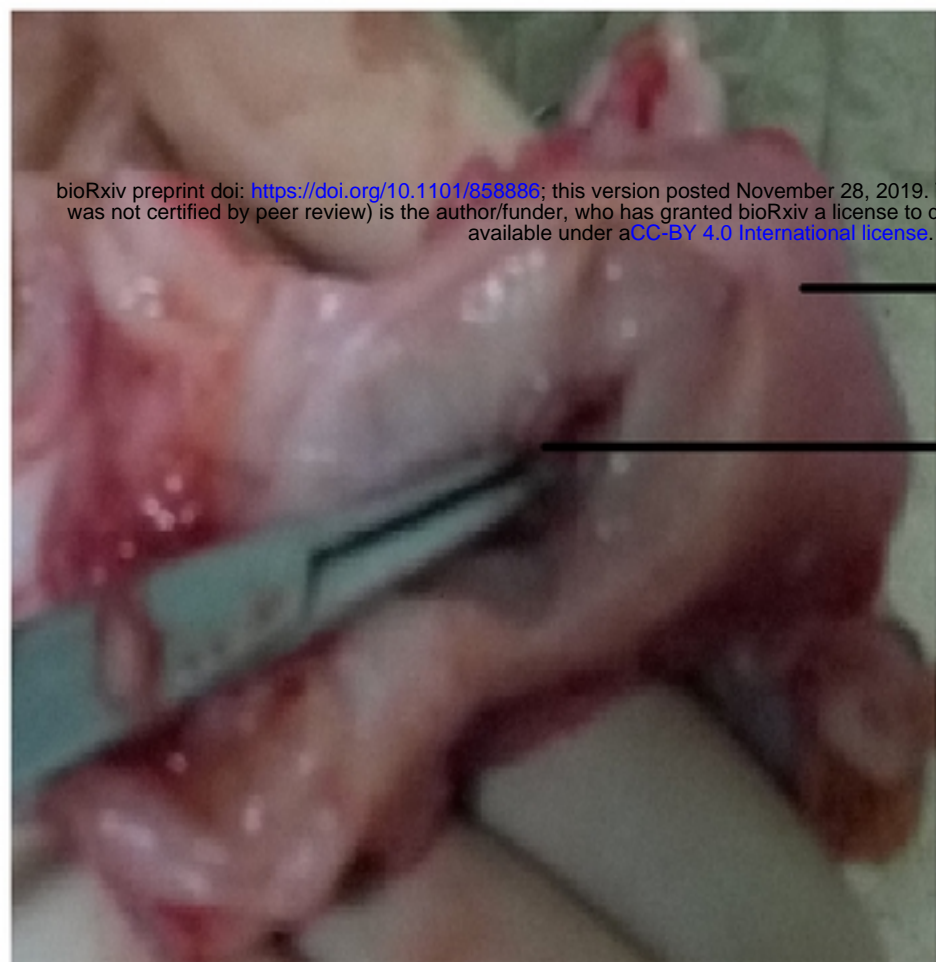

Uterus

3-DGIUD

**A**

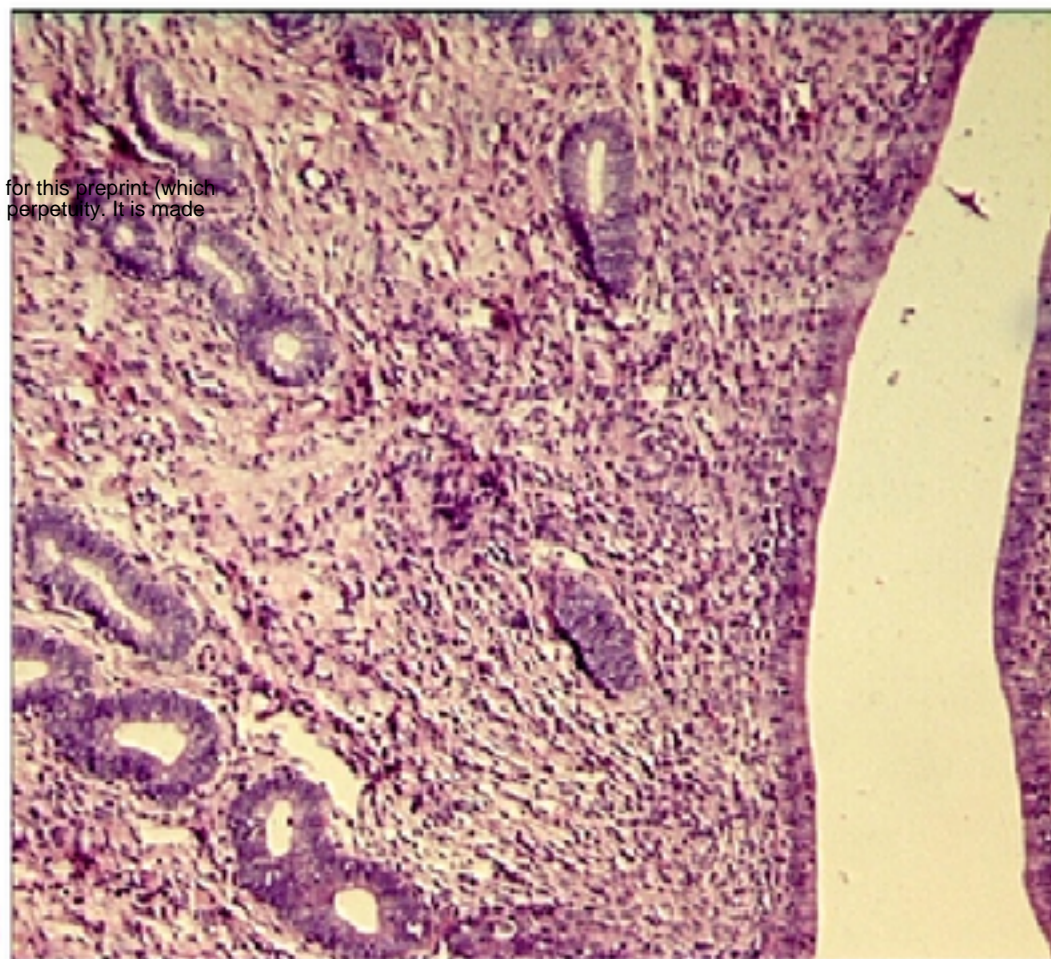

**B**

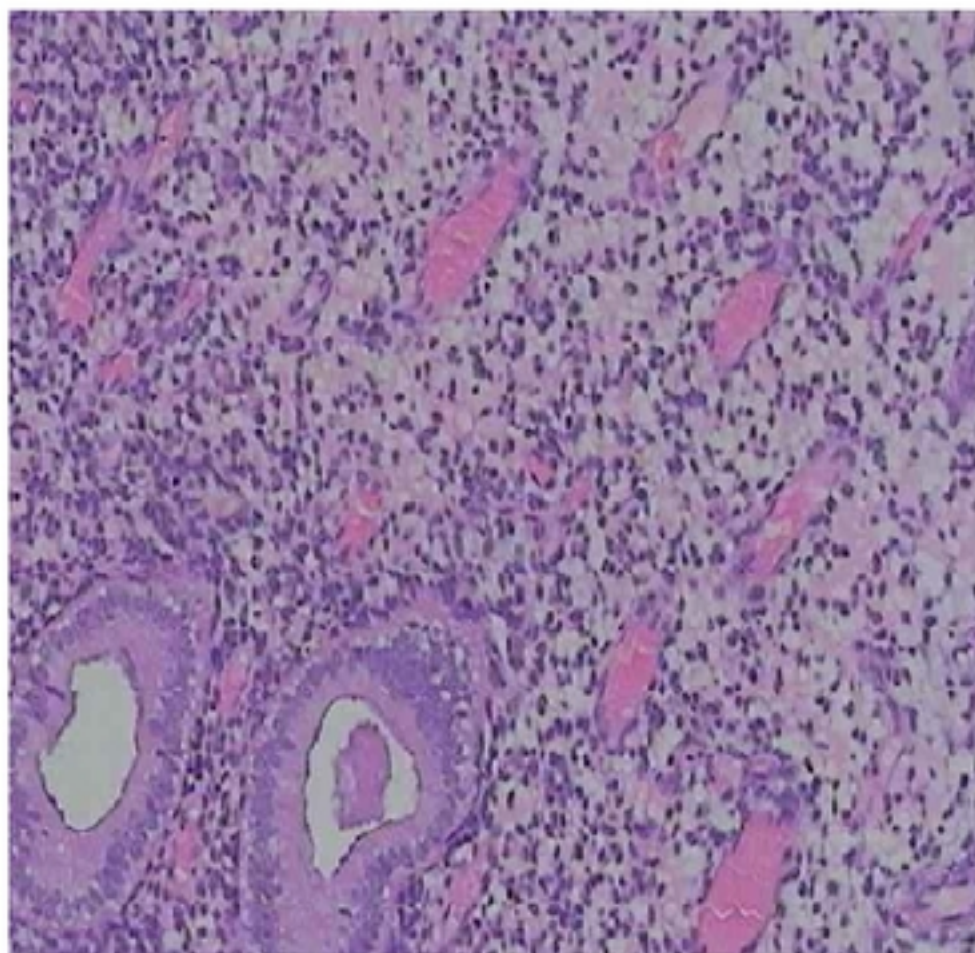

**C**

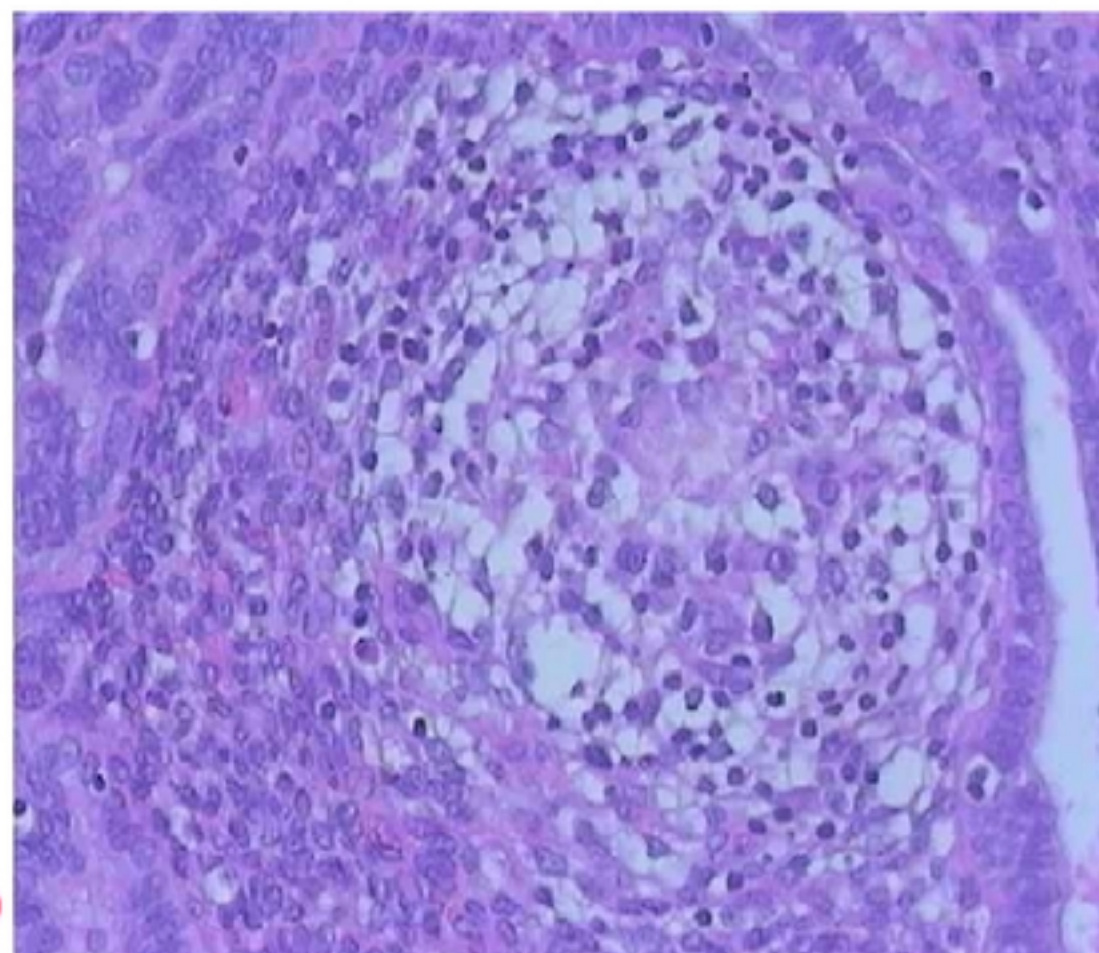

**D**

Figure



bioRxiv preprint doi: <https://doi.org/10.1101/858886>; this version posted November 28, 2019. The copyright holder for this preprint (which was not certified by peer review) is the author/funder, who has granted bioRxiv a license to display the preprint in perpetuity. It is made available under aCC-BY 4.0 International license.

**A**

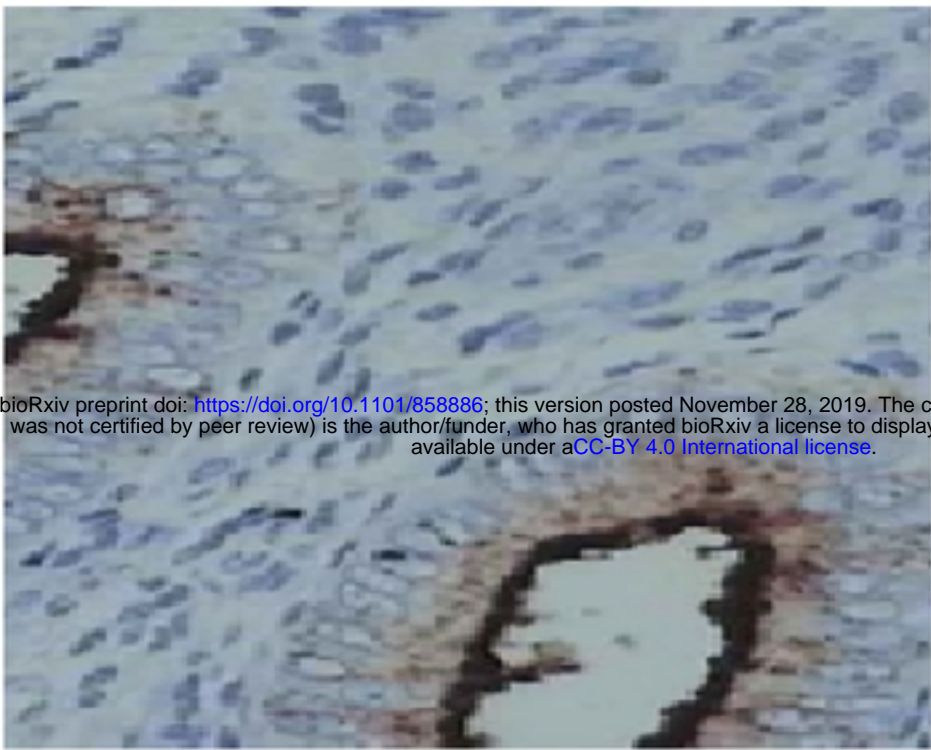

**B**

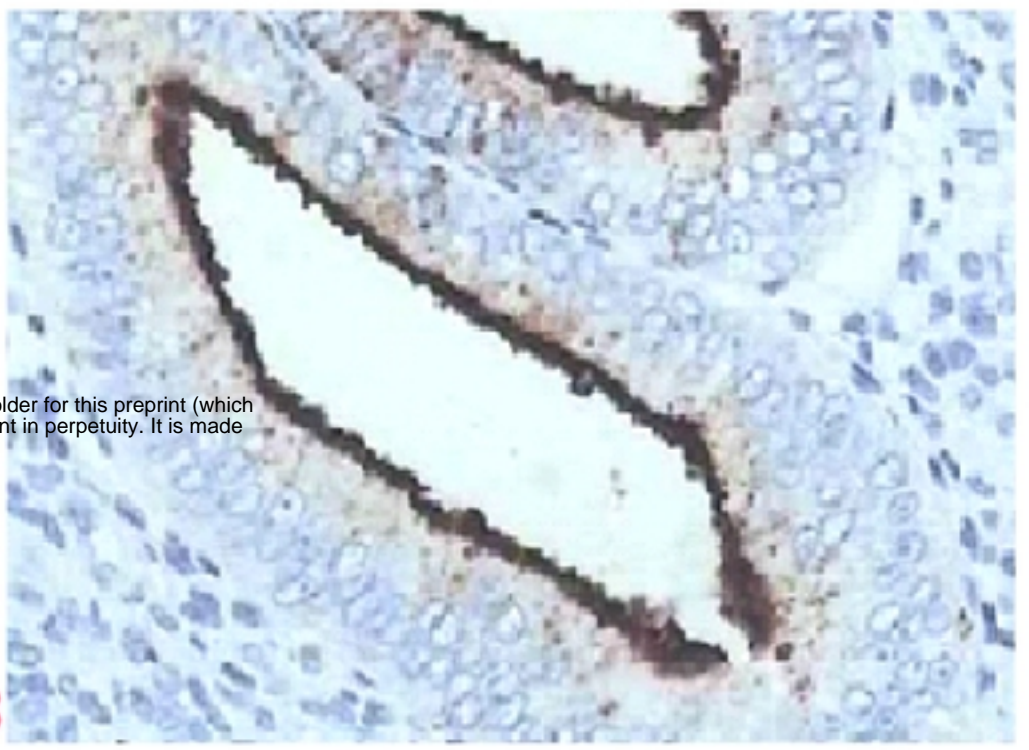

**C**

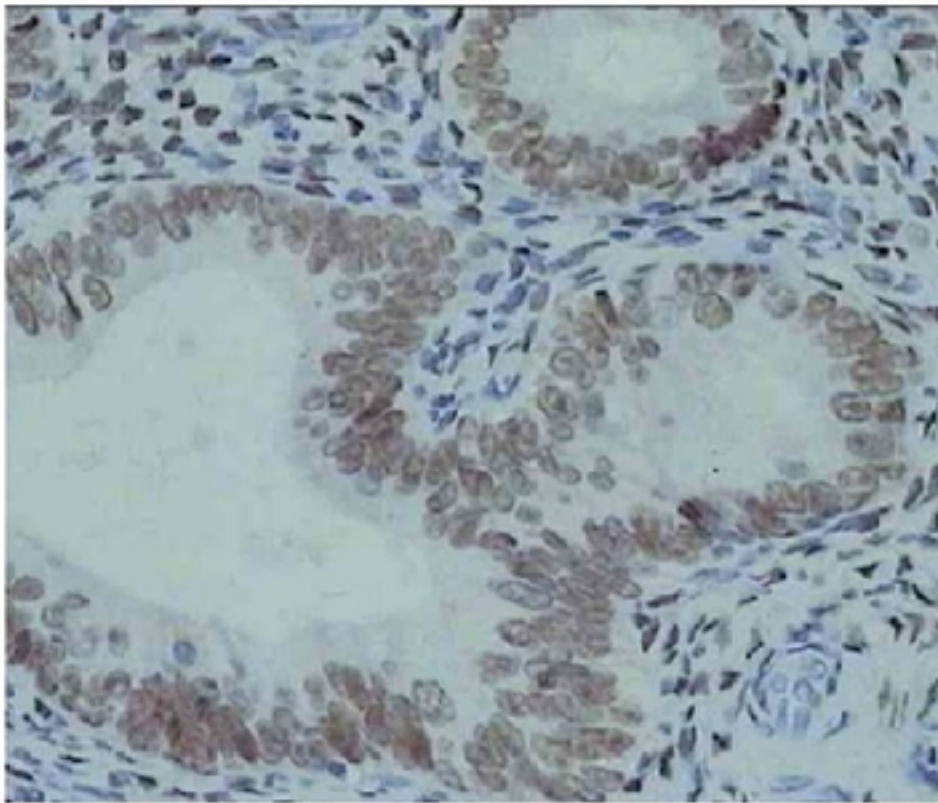

**D**

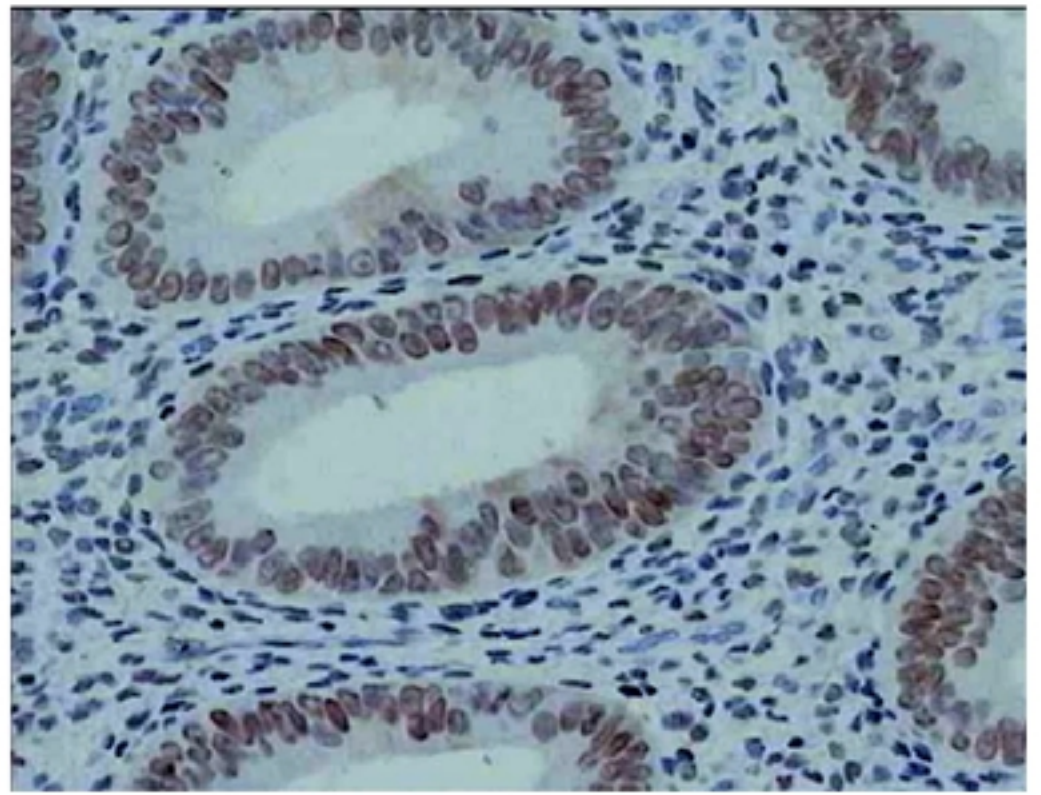

**E**

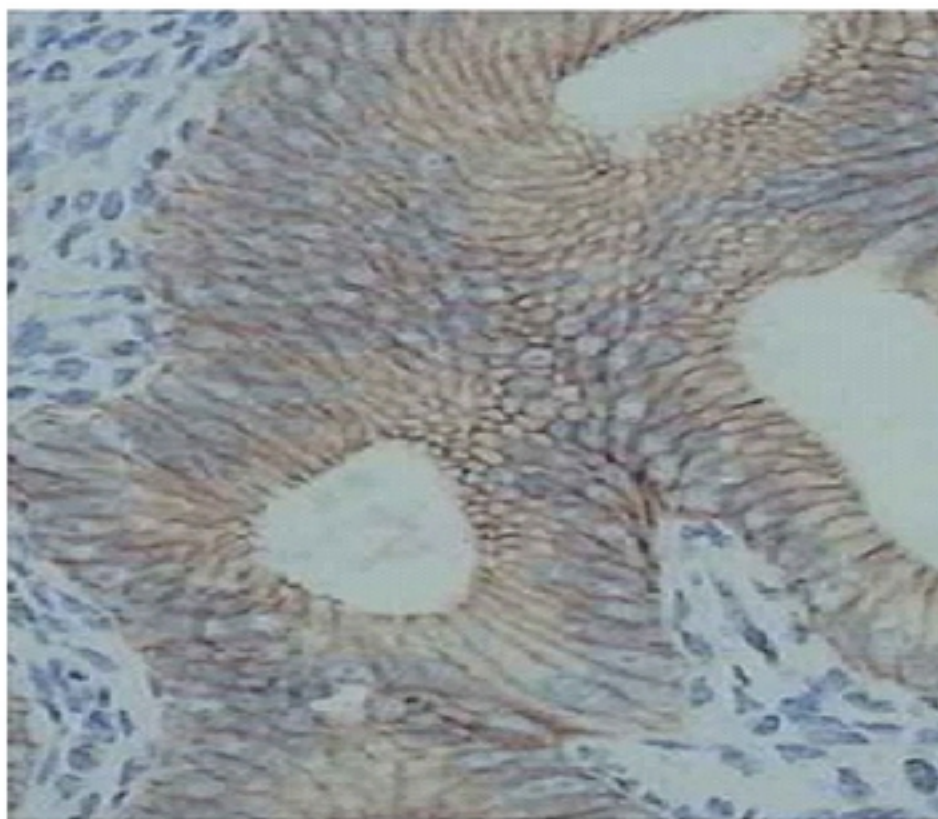

**F**

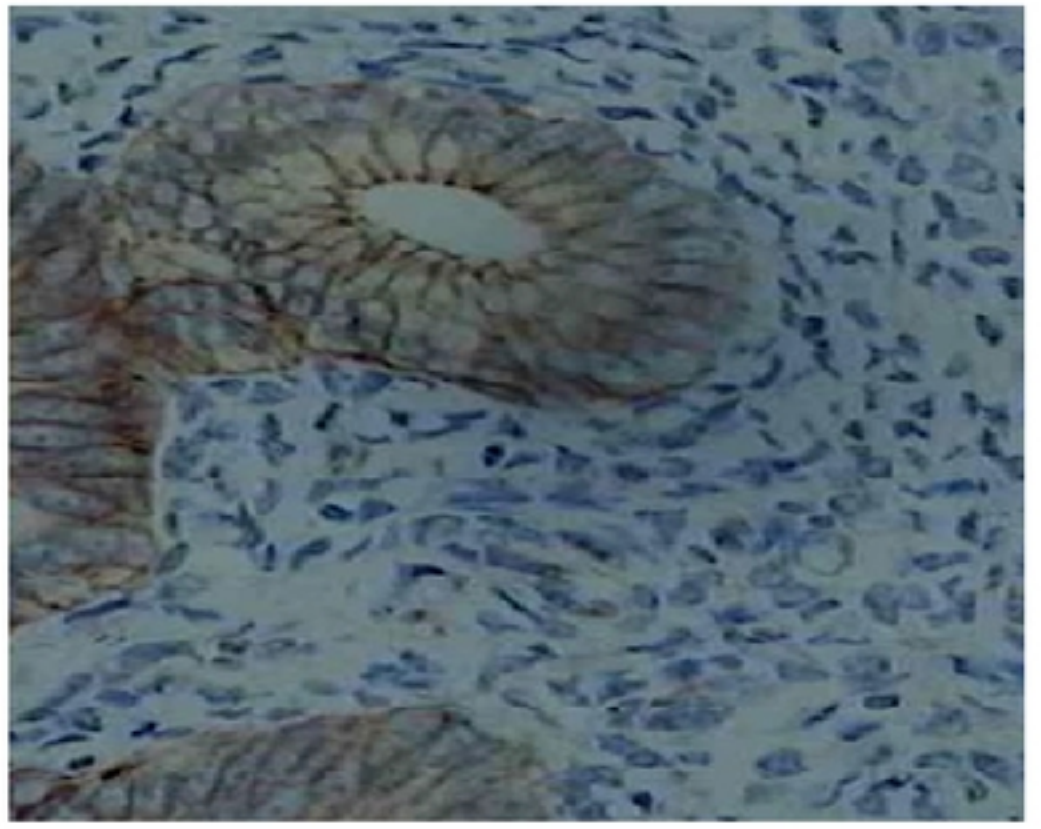

Figure
